# Supplementary material for: Risk of Alzheimer’s Disease in Cancer Patients: Analysis of Mortality Data from the US SEER Population-Based Registries
Source: MDPI journal article supplement (doi:10.3390/cancers12040796), 2020-03-26

# Supplementary Materials: Risk of Alzheimer's Disease in Cancer Patients: Analysis of Mortality Data from the US SEER Population-Based Registries

Roman Mezencev and Yury O. Chernoff

## Supplemental Methods and Results

### Section 1. SEER\*Stat MP-SIR Session Settings

Data: Incidence—SEER 9 Regs Custom Data (with additional treatment fields), Research Data, Nov 2018 (1975–2016) for SMR cases (released: April 2019 based on the November 2018 submission) [1].

Rates: U.S. Mortality 1975–2016 (Nov 2018 submission), Race: W/B/O, Event: COD rec (HIV grouped w/oth infections) [2]

Selection: Select Only Malignant Behavior; Exclude Death Certificate Only and Autopsy Only Cases; Multiple Primary Selection: First Primary Only (Sequence Number 0 or 1).

Parameters: Exposure Date: Date of diagnosis recode; Latency exclusion period (months) 0; Cutoff Dates: Start—Jan 1975, End—Dec 2016;

Events: Analysis Type—Single outcome analysis; Exit Point: Exit at Death, Early Exit at Next Malignant Tumor; Event Variable (original)—COD rec (HIV grouped w/oth infections); Events - Alzheimer disease (ICD-9 and ICD-10 only).

Statistic: Confidence Interval—Exact Method

1. Surveillance, Epidemiology, and End Results (SEER) Program ([www.seer.cancer.gov](http://www.seer.cancer.gov)) SEER\*Stat Database: Incidence—SEER 9 Regs Custom Data (with additional treatment fields), Nov 2018 Sub (1975–2016) for SMRs—Linked To County Attributes—Total U.S., 1969–2017 Counties, National Cancer Institute, DCCPS, Surveillance Research Program, released April 2019, based on the November 2018 submission.

2. U.S. Mortality 1975–2016 (Nov 2018 sub), Race (W/B/O), Event: COD rec (HIV grouped w/oth infectious) Rates are only included for white, black, and other races (not including other unspecified 1978–1991 and unknown). Mortality—All COD, Aggregated Total U.S. (1969–2016) <Katrina/Rita Population Adjustment>

### Section 2 Differences Between Black and White Patients Diagnosed with Cervical Cancers at Age $\geq 45$ years Recorded in SEER9 Registry Between 01/1975 and 12/2016.

Difference between column means (continuous variables) or proportions (categorical variables) is considered significant for *t*-test or Fisher exact test 2-sided *p*-value < 0.05. For each significant pair, the key of the category with the smaller column proportion appears in the category with the larger column proportion. Significance level for upper case letters (A,B): 0.05 (not adjusted for multiple tests)

| Characteristics               | Race: Black (A)                             |                | Race: White (B) |        |
|-------------------------------|---------------------------------------------|----------------|-----------------|--------|
|                               | Count                                       | Median         | Count           | Median |
| Number of Patients            | 4096                                        |                | 18443           |        |
| Age at diagnosis [years]      |                                             | 60             |                 | 60     |
| Person Time [years]           |                                             | 3              |                 | 4      |
| Year of diagnosis             |                                             | 1993           |                 | 1993   |
| ICD-O-3<br>Histology/behavior | 8000/3: Neoplasm, malignant                 | 29             | 120             |        |
|                               | 8001/3: Tumor cells, malignant              | 13<br>B        | 8               |        |
|                               | 8004/3: Malignant tumor, spindle cell type  | 0 <sup>1</sup> | 1               |        |
|                               | 8010/3: Carcinoma, NOS                      | 211            | 838             |        |
|                               | 8012/3: Large cell carcinoma, NOS           | 8              | 30              |        |
|                               | 8013/3: Large cell neuroendocrine carcinoma | 2              | 6               |        |

| Characteristics                                                   | Race: Black (A) |        | Race: White (B) |        |
|-------------------------------------------------------------------|-----------------|--------|-----------------|--------|
|                                                                   | Count           | Median | Count           | Median |
| 8015/3: Glassy cell carcinoma                                     | 0 <sup>1</sup>  |        | 2               |        |
| 8020/3: Carcinoma, undifferentiated, NOS                          | 13              |        | 44              |        |
| 8021/3: Carcinoma, anaplastic, NOS                                | 9               |        | 24              |        |
| 8022/3: Pleomorphic carcinoma                                     | 0 <sup>1</sup>  |        | 2               |        |
| 8032/3: Spindle cell carcinoma, NOS                               | 0 <sup>1</sup>  |        | 7               |        |
| 8041/3: Small cell carcinoma, NOS                                 | 24              |        | 120             |        |
| 8042/3: Oat cell carcinoma                                        | 0 <sup>1</sup>  |        | 2               |        |
| 8044/3: Small cell carcinoma, intermediate cell                   | 0 <sup>1</sup>  |        | 1               |        |
| 8045/3: Combined small cell carcinoma                             | 2               |        | 4               |        |
| 8046/3: Non-small cell carcinoma                                  | 1               |        | 5               |        |
| 8050/3: Papillary carcinoma, NOS                                  | 1               |        | 15              |        |
| 8051/3: Verrucous carcinoma, NOS                                  | 4               |        | 22              |        |
| 8052/3: Papillary squamous cell carcinoma                         | 18              |        | 59              |        |
| 8070/3: Squamous cell carcinoma, NOS                              | 2309<br>B       |        | 9339            |        |
| 8071/3: Squamous cell carcinoma, keratinizing, NOS                | 352<br>B        |        | 1308            |        |
| 8072/3: Squamous cell carcinoma, large cell, nonkeratinizing, NOS | 280             |        | 1505<br>A       |        |
| 8073/3: Squamous cell carcinoma, small cell, nonkeratinizing      | 18              |        | 53              |        |
| 8074/3: Squamous cell carcinoma, spindle cell                     | 2               |        | 6               |        |
| 8075/3: Squamous cell carcinoma, adenoid                          | 2               |        | 6               |        |
| 8076/3: Squamous cell carcinoma, micro-invasive                   | 148             |        | 764             |        |
| 8078/3: Squamous cell carcinoma with horn formation               | 1               |        | 0 <sup>1</sup>  |        |
| 8082/3: Lymphoepithelial carcinoma                                | 1               |        | 2               |        |
| 8083/3: Basaloid squamous cell carcinoma                          | 5               |        | 18              |        |
| 8084/3: Squamous cell carcinoma, clear cell type                  | 0 <sup>1</sup>  |        | 1               |        |
| 8090/3: Basal cell carcinoma, NOS                                 | 1               |        | 1               |        |
| 8092/3: Infiltrating basal cell carcinoma, NOS                    | 1               |        | 0 <sup>1</sup>  |        |
| 8098/3: Adenoid basal cell carcinoma                              | 3               |        | 8               |        |
| 8120/3: Transitional cell carcinoma, NOS                          | 0 <sup>1</sup>  |        | 4               |        |
| 8123/3: Basaloid carcinoma                                        | 0 <sup>1</sup>  |        | 1               |        |
| 8140/3: Adenocarcinoma, NOS                                       | 285             |        | 2195<br>A       |        |
| 8144/3: Adenocarcinoma, intestinal type                           | 1               |        | 6               |        |
| 8147/3: Basal cell adenocarcinoma                                 | 0 <sup>1</sup>  |        | 4               |        |
| 8200/3: Adenoid cystic carcinoma                                  | 19<br>B         |        | 23              |        |
| 8210/3: Adenocarcinoma in adenomatous polyp                       | 1               |        | 6               |        |
| 8240/3: Carcinoid tumor, NOS                                      | 0 <sup>1</sup>  |        | 1               |        |
| 8246/3: Neuroendocrine carcinoma, NOS                             | 6               |        | 36              |        |
| 8255/3: Adenocarcinoma with mixed subtypes                        | 1               |        | 8               |        |
| 8260/3: Papillary adenocarcinoma, NOS                             | 22              |        | 166<br>A        |        |
| 8261/3: Adenocarcinoma in villous adenoma                         | 0 <sup>1</sup>  |        | 2               |        |
| 8262/3: Villous adenocarcinoma                                    | 0 <sup>1</sup>  |        | 9               |        |
| 8263/3: Adenocarcinoma in tubulovillous adenoma                   | 0 <sup>1</sup>  |        | 18              |        |
| 8310/3: Clear cell adenocarcinoma, NOS                            | 24              |        | 149             |        |
| 8320/3: Granular cell carcinoma                                   | 0 <sup>1</sup>  |        | 1               |        |
| 8323/3: Mixed cell adenocarcinoma                                 | 13              |        | 48              |        |
| 8380/3: Endometrioid carcinoma                                    | 17              |        | 190<br>A        |        |

| Characteristics                                            | Race: Black (A)                        |        | Race: White (B) |        |
|------------------------------------------------------------|----------------------------------------|--------|-----------------|--------|
|                                                            | Count                                  | Median | Count           | Median |
| 8382/3: Endometrioid adenocarcinoma, secretory variant     | 0 <sup>1</sup>                         |        | 1               |        |
| 8384/3: Adenocarcinoma, endocervical type                  | 10                                     |        | 164             | A      |
| 8430/3: Mucoepidermoid carcinoma                           | 1                                      |        | 5               |        |
| 8441/3: Serous cystadenocarcinoma, NOS                     | 8                                      |        | 21              |        |
| 8460/3: Papillary serous cystadenocarcinoma                | 9                                      |        | 36              |        |
| 8461/3: Serous surface papillary carcinoma                 | 1                                      |        | 4               |        |
| 8480/3: Mucinous adenocarcinoma                            | 19                                     |        | 148             | A      |
| 8481/3: Mucin-producing adenocarcinoma                     | 8                                      |        | 65              |        |
| 8482/3: Mucinous adenocarcinoma, endocervical type         | 4                                      |        | 35              |        |
| 8490/3: Signet ring cell carcinoma                         | 0 <sup>1</sup>                         |        | 5               |        |
| 8560/3: Adenosquamous carcinoma                            | 127                                    |        | 549             |        |
| 8570/3: Adenocarcinoma with squamous metaplasia            | 1                                      |        | 20              |        |
| 8574/3: Adenocarcinoma with neuroendocrine differentiation | 0 <sup>1</sup>                         |        | 3               |        |
| 8575/3: Metaplastic carcinoma, NOS                         | 0 <sup>1</sup>                         |        | 2               |        |
| 8720/3: Malignant melanoma, NOS                            | 1                                      |        | 7               |        |
| 8770/3: Mixed epithelioid and spindle cell melanoma        | 0 <sup>1</sup>                         |        | 1               |        |
| 8772/3: Spindle cell melanoma, NOS                         | 0 <sup>1</sup>                         |        | 1               |        |
| 8800/3: Sarcoma, NOS                                       | 4                                      |        | 17              |        |
| 8801/3: Spindle cell sarcoma                               | 0 <sup>1</sup>                         |        | 1               |        |
| 8802/3: Giant cell sarcoma                                 | 0 <sup>1</sup>                         |        | 1               |        |
| 8805/3: Undifferentiated sarcoma                           | 0 <sup>1</sup>                         |        | 1               |        |
| 8810/3: Fibrosarcoma, NOS                                  | 1                                      |        | 0 <sup>1</sup>  |        |
| 8890/3: Leiomyosarcoma, NOS                                | 5                                      |        | 39              |        |
| 8891/3: Epithelioid leiomyosarcoma                         | 0 <sup>1</sup>                         |        | 3               |        |
| 8896/3: Myxoid leiomyosarcoma                              | 2                                      |        | 0 <sup>1</sup>  |        |
| 8900/3: Rhabdomyosarcoma, NOS                              | 2                                      |        | 4               |        |
| 8902/3: Mixed type rhabdomyosarcoma                        | 1                                      |        | 0 <sup>1</sup>  |        |
| 8910/3: Embryonal rhabdomyosarcoma, NOS                    | 0 <sup>1</sup>                         |        | 2               |        |
| 8920/3: Alveolar rhabdomyosarcoma                          | 1                                      |        | 0 <sup>1</sup>  |        |
| 8933/3: Adenosarcoma                                       | 0 <sup>1</sup>                         |        | 23              |        |
| 8935/3: Stromal sarcoma, NOS                               | 1                                      |        | 5               |        |
| 8950/3: Mullerian mixed tumor                              | 16                                     |        | 32              |        |
| 8951/3: Mesodermal mixed tumor                             | 5                                      |        | 8               |        |
| 8980/3: Carcinosarcoma, NOS                                | 18                                     |        | 32              |        |
| 9064/3: Germinoma                                          | 0 <sup>1</sup>                         |        | 1               |        |
| 9100/3: Choriocarcinoma, NOS                               | 1                                      |        | 0 <sup>1</sup>  |        |
| 9110/3: Mesonephroma, malignant                            | 3                                      |        | 17              |        |
| 9364/3: Peripheral neuroectodermal tumor                   | 0 <sup>1</sup>                         |        | 2               |        |
| Grade                                                      | Moderately differentiated; Grade II    | 891    |                 | 4593   |
|                                                            | Poorly differentiated; Grade III       | 1167   |                 | 4814   |
|                                                            | Undifferentiated; anaplastic; Grade IV | 131    |                 | 598    |
|                                                            | Unknown                                | 1722   |                 | 6992   |
|                                                            | Well differentiated; Grade I           | 185    |                 | 1446   |
| SEER historic stage A (1973–2015)                          | Blank(s)                               | 93     |                 | 366    |
|                                                            | Distant                                | 589    |                 | 2372   |
|                                                            | Localized                              | 1417   |                 | 7339   |

| Characteristics | Race: Black (A)                                       |        | Race: White (B) |        |
|-----------------|-------------------------------------------------------|--------|-----------------|--------|
|                 | Count                                                 | Median | Count           | Median |
| Regional        | 1697                                                  | B      | 7175            |        |
| Unstaged        | 300                                                   | B      | 1191            |        |
| Chemotherapy    | No                                                    | 3091   | 14092           |        |
|                 | Yes                                                   | 1005   | 4351            |        |
| Radiotherapy    | Beam radiation                                        | 1123   | 4273            |        |
|                 | Combination of beam with implants or isotopes         | 1263   | 6364            | A      |
|                 | None/Unknown                                          | 1314   | 6503            | A      |
|                 | Other than beam radiation (1973-1987 cases only)      | 63     | 346             |        |
|                 | Radiation, NOS method or source not specified         | 125    | 302             |        |
|                 | Radioactive implants (includes brachytherapy) (1988+) | 121    | 393             |        |
|                 | Radioisotopes (1988+)                                 | 2      | 18              |        |
|                 | Recommended, unknown if administered                  | 63     | 154             |        |
|                 | Refused (1988+)                                       | 22     | 90              |        |

<sup>1</sup> Category not used in comparisons, because its column proportion is equal to 0 or 1.

### Section 3 Comparison of Age-Specific Mortality Rates for Alzheimer Disease in Breast Cancer Patients

This analysis included white women diagnosed with breast cancer of IDC histological type at age groups 65–69 years, 70–74 years, 75–79 years, 80–84 years between 2000–2016 (Incidence-SEER 18 Regs excluding AK Research Data, Nov 2018 Sub (2000–2016) for SMR) who attained ages 70–74 years, 75–79 years, 80–85 years, and 85–89 years. Death of Alzheimer disease was considered as an event of interest and cases with any other outcome (diagnosis of second primary cancers, death of other causes, end of study or a loss of follow-up) were censored. Numbers of events and total person-years were accumulated for each age group at diagnosis and group of attained age and the age-specific AD mortality rates were calculated

### Results

Age at BC: age at breast cancer diagnosis; O: number of observed AD deaths; SMR: standardized mortality for AD death; PYR: accumulated person-years; Age-specific mortality rates are per 100,000 person-years; CI95: 95%-confidence intervals calculated by the Mid-p-exact method; \*  $p < 0.05$  (for SMR; not adjusted for multiple tests).

| Attained Age |     | 70–74 |          |                             |             | 75–79 |        |          |                             |             |
|--------------|-----|-------|----------|-----------------------------|-------------|-------|--------|----------|-----------------------------|-------------|
| Age at BC    | O   | SMR   | PYR      | Age-specific mortality rate | CI95        | O     | SMR    | PYR      | Age-specific mortality rate | CI95        |
| 65–69        | 42  | 0.83  | 135706.9 | 30.95                       | 25.59–41.44 | 81    | 1.16   | 57092.65 | 141.9                       | 113.4–175.4 |
| 70–74        | 19  | 0.60* | 87453.05 | 21.73                       | 13.47–33.30 | 103   | 0.81 * | 106995   | 96.27                       | 78.98–116.3 |
| 75–79        | N/A | N/A   | N/A      | N/A                         | N/A         | 49    | 0.59 * | 72041.31 | 68.02                       | 50.87–89.18 |
| 80–84        | N/A | N/A   | N/A      | N/A                         | N/A         | N/A   | N/A    | N/A      | N/A                         | N/A         |
| 85–89        | N/A | N/A   | N/A      | N/A                         | N/A         | N/A   | N/A    | N/A      | N/A                         | N/A         |

  

| Attained Age |    | 80–84 |          |                             |             | 85–89 |     |       |                             |             |
|--------------|----|-------|----------|-----------------------------|-------------|-------|-----|-------|-----------------------------|-------------|
| Age at BC    | O  | SMR   | PYR      | Age-specific mortality rate | CI95        | O     | SMR | PYR   | Age-specific mortality rate | CI95        |
| 65–69        | 57 | 1.2   | 13361.12 | 426.6                       | 326.1–457.8 | 2     | 0.6 | 237.2 | 843.2                       | 141.4–278.6 |

|       |     |        |          |       |             |     |        |          |       |             |
|-------|-----|--------|----------|-------|-------------|-----|--------|----------|-------|-------------|
| 70–74 | 140 | 0.96   | 44074.36 | 317.6 | 268.2–373.6 | 90  | 0.75 * | 9457.58  | 951.6 | 769.7–1164  |
| 75–79 | 195 | 0.71 * | 86631.93 | 225.1 | 195.1–258.4 | 285 | 0.73 * | 33044    | 862.5 | 766.6–967.1 |
| 80–84 | 113 | 0.71 * | 51503.74 | 219.4 | 181.7–262.8 | 347 | 0.58 * | 53422.58 | 649.5 | 583.8–720.6 |
| 85–89 | N/A | N/A    | N/A      | N/A   | N/A         | 127 | 0.43 * | 27184.5  | 467.2 | 391.1–553.9 |

Summary of results: Age-specific mortality rates for Alzheimer disease at different ages of breast cancer diagnosis (point estimates). Color coding indicates time between BC diagnosis and attained age (as differences between centers of time intervals: black =0 years; blue = 5 years; green = 10 years; red: 15 years; violet = 20 years).

| Attained Age | 70–74 | 75–79 | 80–84 | 85 ± 89 |
|--------------|-------|-------|-------|---------|
| Age at BC    |       |       |       |         |
| 65–69        | 30.95 | 141.9 | 426.6 | 843.2   |
| 70–74        | 21.73 | 96.27 | 317.6 | 951.6   |
| 75–79        |       | 68.02 | 225.1 | 862.5   |
| 80–84        |       |       | 219.4 | 649.5   |
| 85–89        |       |       |       | 467.2   |

Section 4 Cox Proportional Hazards Models for AD Death Rate in Women Diagnosed with Breast Cancer at ≥45 Years.

4.1. Analysis for the Effect of Race Stratified on 5 Age Groups: 1 (45–54 years), 2: (55–64 years), 3 (65–74 years), 4 (75–84 years), and 5 (85+ years).

| Variable  | Estimate | SE    | z-value | p-value  | Hazard Rate (HR) | CI95 (HR)   |
|-----------|----------|-------|---------|----------|------------------|-------------|
| Race:AIAN | -0.358   | 0.409 | -0.877  | 0.3806   | 0.699            | 0.314–1.557 |
| Race:API  | -0.605   | 0.090 | -6.727  | 1.73e-11 | 0.546            | 0.458–0.651 |
| Race:B    | -0.292   | 0.087 | -3.372  | 7.46e-4  | 0.747            | 0.631–0.885 |
| Race:W    | Baseline |       |         |          |                  |             |

N = 337,267; Number of events: 3,876  
Likelihood ratio test = 65.71 on 3 df, p = 4e-14; Wald test = 55.71 on 3 df, p = 5e-12

4.2. Analysis for Effect of Age at BC Diagnosis in White Women Diagnosed at ≥45 Years with Age as Continuous (A) or Ordinal (grouped) Variable (B)

Non proportional hazards detected when age is modeled in five 10-year age groups (B) but not when modelled as a continuous variable

| A                          | Estimate | SE      | z-value | p-value | Hazard Rate (HR) | CI95 (HR)   |
|----------------------------|----------|---------|---------|---------|------------------|-------------|
| Age at BC diagnosis [yrs.] | 0.1636   | 2.09e-3 | 78.17   | <2e-16  | 1.178            | 1.173–1.183 |

N = 282,092; Number of events: 3,603  
Likelihood ratio test = 7663 on 1 df, p = <2e-16; Wald test = 6111 on 1 df, p = <2e-16  
Schoenfeld residuals correlation: rho = -0.0289; Chi-sq = 2.14, p = 0.144

| B                                | Estimate | SE     | z-value | p-value | Hazard Rate (HR) | CI95 (HR)       |
|----------------------------------|----------|--------|---------|---------|------------------|-----------------|
| Age at BC diagnosis (45–54 yrs.) | Baseline |        |         |         |                  |                 |
| Age at BC diagnosis (55–64 yrs.) | 1.738    | 0.0955 | 18.2    | <2e-16  | 5.688            | 4.717–6.858     |
| Age at BC diagnosis (65–74 yrs.) | 3.322    | 0.0936 | 35.5    | <2e-16  | 27.710           | 23.066–33.287   |
| Age at BC diagnosis (75–84 yrs.) | 4.796    | 0.0961 | 49.9    | <2e-16  | 121.024          | 100.247–146.107 |
| Age at BC diagnosis (85+ yrs.)   | 5.951    | 0.1073 | 55.4    | <2e-16  | 384.220          | 311.319–474.192 |

N = 282,092; Number of events: 3,603  
Likelihood ratio test = 6926 on 4 df, p = <2e-16; Wald test = 5198 on 4 df, p = <2e-16  
Schoenfeld residuals correlation:  
(55–64 yrs.): rho = -0.0829, Chisq = 23.4, p = 1.31e-06  
(65–74 yrs.): rho = -0.1327, Chisq = 56.0, p = 7.10e-14  
(75–84 yrs.): rho = -0.1473, Chisq = 67.3, p = 2.28e-16  
(85+ yrs.): rho = -0.1314, Chisq = 53.9, p = 2.08e-13  
GLOBAL: Chisq = 81.9, p = 6.79e-17

#### 4.3. Analysis for Effect of Chemotherapy, Radiation Therapy, Year of Diagnosis and Age at BC Diagnosis in White Women Diagnosed at $\geq 45$ years

| Variable                      | Estimate | SE     | z-value | p-value | Hazard rate (HR) | CI95 (HR)   |
|-------------------------------|----------|--------|---------|---------|------------------|-------------|
| Chemotherapy: Yes             | -0.1942  | 0.0657 | -2.953  | 0.00315 | 0.824            | 0.724–0.937 |
| Chemotherapy: No/Unknown      | Baseline |        |         |         |                  |             |
| Radiation therapy: Beam       | -0.1322  | 0.0382 | -3.463  | 0.00054 | 0.876            | 0.813–0.944 |
| Radiation therapy: No/Unknown | Baseline |        |         |         |                  |             |
| Radiation therapy: Other      | -0.2963  | 0.1533 | -1.933  | 0.05323 | 0.744            | 0.551–1.004 |
| Age at BC diagnosis           | 0.1587   | 0.0022 | 72.77   | <2e-16  | 1.1720           | 1.167–1.177 |
| Year at BC diagnosis:1        | Baseline |        |         |         |                  |             |
| Year at BC diagnosis:2        | 0.541    | 0.0552 | 9.80    | <2e-16  | 1.717            | 1.541–1.914 |
| Year at BC diagnosis:3        | 1.105    | 0.0611 | 18.090  | <2e-16  | 3.020            | 2.679–3.404 |
| Year at BC diagnosis:4        | 1.369    | 0.0796 | 17.199  | <2e-16  | 3.930            | 3.363–4.594 |

N = 282,092; Number of events: 3,603 Likelihood ratio test = 8124 on 7 df,  $p = <2e-16$ ; Wald test = 6568 on 7 df,  $p = <2e-16$ .

Results of a test for the proportional hazards assumption of a Cox regression model using `cox.zph` function in the R. Rho: correlation coefficient between transformed survival time and the scaled Schoenfeld residuals;  $p$ -value is two-sided.

| Variable                | rho       | Chisq    | p-value  |
|-------------------------|-----------|----------|----------|
| Chemotherapy: YES       | 0.05817   | 12.60716 | 3.84e-04 |
| Radiotherapy:Beam       | 0.047615  | 8.26627  | 4.04e-03 |
| Radiotherapy:Other      | 0.000638  | 0.001479 | 9.69e-01 |
| Year at diagnosis 2     | -0.094366 | 30.64294 | 3.10e-08 |
| Year at diagnosis 3     | -0.104237 | 35.12337 | 3.09e-09 |
| Year at diagnosis 4     | -0.076388 | 18.98831 | 1.32e-05 |
| Age at diagnosis (cont) | 0.006976  | 0.12938  | 7.19e-01 |
| Global                  | NA        | 54.66111 | 1.74e-09 |

#### 4.4. Analysis for Effect of Chemotherapy, Radiation Therapy and Age at BC Diagnosis (Continuous Variable) in White Women Diagnosed at $\geq 45$ years

| Variable                      | Estimate | SE      | z-value | p-value | Hazard Rate (HR) | CI95 (HR)   |
|-------------------------------|----------|---------|---------|---------|------------------|-------------|
| Chemotherapy: Yes             | -0.0677  | 0.0653  | -1.04   | 0.300   | 0.935            | 0.822–1.062 |
| Chemotherapy: No/Unknown      | Baseline |         |         |         |                  |             |
| Radiation therapy: Beam       | 0.0932   | 0.0368  | 2.53    | 0.011   | 1.098            | 1.021–1.180 |
| Radiation therapy: No/Unknown | Baseline |         |         |         |                  |             |
| Radiation therapy: Other      | -0.0353  | 0.1524  | -0.23   | 0.817   | 0.965            | 0.716–1.301 |
| Age at BC diagnosis           | 0.1638   | 0.00217 | 75.38   | <2e-16  | 1.180            | 1.173–1.183 |

N = 282,092; Number of events: 3,603 Likelihood ratio test = 7671 on 4 df,  $p = <2e-16$ ; Wald test = 6089 on 4 df,  $p = <2e-16$ .

Results of a test for the proportional hazards assumption of a Cox regression model using `cox.zph` function in the R. Rho: correlation coefficient between transformed survival time and the scaled Schoenfeld residuals;  $p$ -value is two-sided.

| Variable                | rho      | Chisq | p-value |
|-------------------------|----------|-------|---------|
| Chemotherapy: YES       | 0.03769  | 5.173 | 0.0229  |
| Radiotherapy:Beam       | 0.00974  | 0.338 | 0.5609  |
| Radiotherapy:Other      | -0.01249 | 0.563 | 0.4531  |
| Age at diagnosis (cont) | -0.01796 | 0.859 | 0.3540  |
| Global                  | NA       | 8.707 | 0.0688  |

Removal of the variable “Year at diagnosis” produced a model predicting significantly increased risk of the AD death in breast cancer patients treated with beam radiation relative to breast cancer patients with no beam radiation therapy, adjusted for age at diagnosis (continuous) and the use of chemotherapy (HR = 1.10; CI95: 1.02–1.18;  $p = 0.011$ ). Similarly, administration of

chemotherapy was associated with decreased risk of AD death relative to the group with no or unknown chemotherapy administration, but the risk reduction did not reach statistical significance (HR = 0.94; CI95: 0.82–1.06;  $p = 0.300$ ). Risk of AD death was significantly increasing with increasing age at breast cancer (estimated 18% increase in the expected hazard per one-year increase in the age at diagnosis). Violation of proportionality assumption was found (Global and Chemotherapy: Yes).

*Section 5 Analysis of the Role of Estrogen Receptor (ER)-Status in Younger Breast Cancer (BC) Patients (age at Diagnosis < 54 years) on the Risk of Alzheimer Disease Death*

This analysis was performed using cases recorded in SEER 13 registry for SMR (1992–2016) for all races combined.

| Time Since BC<br>Diagnosis<br>(months) | ER-positive BC |                   |         | ER-negative BC |                   |        |
|----------------------------------------|----------------|-------------------|---------|----------------|-------------------|--------|
|                                        | O              | SMR (CI95)        | N       | O              | SMR (CI95)        | N      |
| 2–11                                   | 0              | 0.00 (0.00–19.12) | 130,855 | 0              | 0.00 (0.00–67.18) | 45,918 |
| 12–59                                  | 0              | 0.00 (0.00–2.51)  | 121,899 | 0              | 0.00 (0.00–9.33)  | 42,639 |
| 60–119                                 | 4              | 1.12 (0.31–2.87)  | 86,182  | 2              | 1.99 (0.24–7.19)  | 27,912 |
| 120+                                   | 20             | 1.02 (0.62–1.58)  | 50,934  | 5              | 0.73 (0.24–1.71)  | 18,328 |
| Total                                  | 24             | 0.97 (0.62–1.44)  | 130,855 | 7              | 0.85 (0.34–1.75)  | 45,918 |

O: number of observed AD deaths; SMR: standardized mortality ratio for AD death; CI95: 95%-confidence intervals calculated by the Mid-p-exact method; \*  $p < 0.05$  (for SMR, *not adjusted for multiple tests*), N: number of BC cases.

**Table S1.** List of all cancer sites included to the SMR analysis for patients diagnosed with cancers at  $\geq 45$  years of age. The table conveys aggregation of cancer sites used in the SMR analysis. The rows highlighted by grey color correspond to cancer sites for which the total number of person-years at risk did not reach 100,000 person-years for any specific race. O: number of deaths due to Alzheimer disease in a group of patients with specific race who were diagnosed with cancers at specific sites. SMR: standardized mortality ratios for AD deaths in patients diagnosed with cancer relative to the general populations; PYR: accumulated person-years at risk. Races: AIAN: American Indian/Alaska Native; API: Asian/Pacific Islander. \*  $p < 0.05$  for SMR values (not adjusted for multiple tests).

| Cancer Site                              | White  |        |               | Black |        |              | AIAN |        |           | API |        |              |
|------------------------------------------|--------|--------|---------------|-------|--------|--------------|------|--------|-----------|-----|--------|--------------|
|                                          | O      | SMR    | PYR           | O     | SMR    | PYR          | O    | SMR    | PYR       | O   | SMR    | PYR          |
| All Sites                                | 21,098 | 0.97 * | 17,226,235.60 | 1,086 | 0.98   | 1,547,446.29 | 40   | 1.38   | 81,733.97 | 855 | 1.23 * | 1,166,766.56 |
| All Solid Tumors                         | 19,868 | 0.99 * | 15,943,508.31 | 1,037 | 0.99   | 1,442,908.75 | 40   | 1.46 * | 75,722.22 | 810 | 1.23 * | 1,095,727.10 |
| All Lymphatic and Hematopoietic Diseases | 960    | 0.75 * | 1,125,432.10  | 36    | 0.68 * | 91,785.13    | 0    | 0      | 5,121.82  | 35  | 1.05   | 62,056.49    |
| Oral cavity                              | 319    | 1.02   | 375,369.60    | 11    | 1.2    | 24,700.24    | 2    | 3.94   | 1,524.91  | 9   | 1      | 18,163.39    |
| Pharynx                                  | 12     | 0.73   | 37,676.06     | 2     | 1.69   | 5,252.56     | 0    | 0      | 252.28    | 5   | 2.1    | 13,331.29    |
| Esophagus                                | 39     | 0.91   | 52,094.20     | 3     | 1.37   | 6,912.72     | 0    | 0      | 266.6     | 0   | 0      | 3,096.08     |
| Stomach                                  | 133    | 0.93   | 115,903.55    | 16    | 1.02   | 19,615.24    | 0    | 0      | 1,214.15  | 29  | 1.35   | 31,539.76    |
| Small Intestine                          | 39     | 0.74   | 48,794.97     | 4     | 0.92   | 7,264.77     | 0    | 0      | 246.56    | 4   | 3.56   | 2,961.59     |
| Colon excluding Rectum                   | 2,435  | 0.99   | 1,397,529.18  | 141   | 1      | 138,443.43   | 5    | 1.69   | 6,040.03  | 129 | 1.33 * | 120,446.85   |
| Rectum and Rectosigmoid Junction         | 781    | 1.01   | 620,514.43    | 42    | 1.32   | 47,469.32    | 1    | 1      | 3,285.69  | 47  | 1.35   | 64,251.65    |
| Anus, Anal Canal and Anorectum           | 54     | 0.95   | 52,094.25     | 2     | 0.61   | 5,549.41     | 0    | 0      | 240.09    | 3   | 2.46   | 1,881.47     |
| Liver                                    | 5      | 0.26 * | 34,398.00     | 2     | 1.19   | 6,415.47     | 0    | 0      | 833.87    | 7   | 1.6    | 13,770.56    |
| Gallbladder                              | 31     | 1.41   | 14,141.80     | 2     | 2.34   | 1,341.05     | 0    | 0      | 470.25    | 2   | 1.58   | 1,941.92     |
| Pancreas                                 | 46     | 0.77   | 65,098.37     | 6     | 1.23   | 8,820.35     | 0    | 0      | 442.46    | 5   | 1.53   | 6,312.29     |
| Nose, Nasal Cavity and Middle Ear        | 29     | 1.31   | 22,864.98     | 1     | 1.2    | 1,752.72     | 0    | 0      | 201.58    | 2   | 2.84   | 2,299.17     |
| Larynx                                   | 105    | 0.80 * | 188,869.85    | 11    | 1.27   | 22,761.68    | 0    | 0      | 574.6     | 3   | 0.88   | 7,879.55     |
| Pleura                                   | 0      | 0      | 395.78        | 0     | 0      | 45.05        | 0    | 0      | 7.75      | 0   | 0      | 44.01        |
| Lung and Bronchus                        | 553    | 0.84 * | 743,630.00    | 42    | 1.13   | 83,617.89    | 3    | 3.44   | 2,896.29  | 25  | 0.94   | 55,754.13    |
| Bones and Joints                         | 12     | 0.89   | 18,686.80     | 1     | 1.87   | 1,331.15     | 0    | 0      | 130.8     | 0   | 0      | 980.71       |
| Soft Tissue including Heart              | 85     | 0.92   | 81,528.15     | 2     | 0.43   | 8,283.67     | 2    | 8.39 * | 469.32    | 5   | 1.33   | 6,472.18     |
| Melanoma of the Skin                     | 814    | 0.92 * | 853,069.15    | 5     | 1.67   | 3,441.66     | 0    | 0      | 1,582.13  | 3   | 1.01   | 5,322.96     |
| Female Breast                            | 5,375  | 1.01   | 3,847,928.29  | 229   | 0.98   | 300,647.12   | 9    | 1.45   | 18,394.56 | 179 | 1.12   | 285,072.71   |
| Cervix Uteri                             | 102    | 0.93   | 147,863.25    | 25    | 1.56 * | 27,857.60    | 0    | 0      | 2,079.22  | 12  | 1.31   | 22,348.09    |
| Corpus Uteri                             | 1,577  | 1.02   | 1,057,883.80  | 35    | 0.94   | 46,473.50    | 2    | 1.34   | 4,299.48  | 32  | 1.05   | 64,136.37    |
| Ovary                                    | 185    | 0.82 * | 228,702.81    | 9     | 1.06   | 13,223.97    | 1    | 2.55   | 1,788.23  | 5   | 0.75   | 17,139.28    |
| Prostate                                 | 4,914  | 1.01   | 3,851,028.54  | 372   | 0.92   | 536,227.59   | 10   | 1.38   | 16,580.77 | 207 | 1.22 * | 222,993.15   |
| Testis                                   | 4      | 0.36 * | 46,310.76     | 0     | 0      | 1,039.40     | 0    | 0      | 208.07    | 0   | 0      | 1,693.35     |
| Urinary Bladder                          | 1,307  | 0.95 * | 991,275.67    | 30    | 0.89   | 35,724.41    | 3    | 4      | 2,208.48  | 46  | 1.47 * | 38,391.77    |
| Kidney                                   | 343    | 0.95   | 372,034.87    | 19    | 0.85   | 39,159.80    | 1    | 0.68   | 4,812.42  | 15  | 1.42   | 22,663.97    |
| Renal Pelvis                             | 41     | 1.18   | 26,209.00     | 2     | 2.53   | 1,105.84     | 0    | 0      | 69.88     | 0   | 0      | 1,752.16     |
| Ureter                                   | 17     | 1.01   | 13,449.13     | 0     | 0      | 327.92       | 0    | 0      | 16.42     | 1   | 0.98   | 1,257.19     |
| Brain                                    | 23     | 1.47   | 52,077.42     | 2     | 2.49   | 2,785.12     | 0    | 0      | 229.27    | 4   | 8.03 * | 2,712.95     |
| Cranial Nerves Other Nervous System      | 9      | 1.25   | 10,459.26     | 0     | 0      | 1,063.93     | 1    | 26.95  | 132.4     | 1   | 3.88   | 823.37       |



| Cancer Site                           | White |        |            | Black |        |           | AIAN |     |          | API |      |           |
|---------------------------------------|-------|--------|------------|-------|--------|-----------|------|-----|----------|-----|------|-----------|
|                                       | O     | SMR    | PYR        | O     | SMR    | PYR       | O    | SMR | PYR      | O   | SMR  | PYR       |
| Thyroid                               | 170   | 0.78 * | 309,954.66 | 5     | 0.53   | 21,156.47 | 0    | 0   | 2,490.74 | 10  | 0.77 | 40,503.79 |
| Thymus                                | 3     | 0.62   | 7,283.73   | 0     | 0      | 1,259.73  | 0    | 0   | 52.35    | 0   | 0    | 1,919.17  |
| Adrenal Gland                         | 1     | 0.47   | 3,520.86   | 1     | 12.77  | 400.41    | 0    | 0   | 34.85    | 0   | 0    | 321.16    |
| Hodgkin Lymphoma                      | 16    | 0.50 * | 54,416.88  | 2     | 1.61   | 4,999.99  | 0    | 0   | 211.02   | 0   | 0    | 1,903.80  |
| Non-Hodgkin Lymphoma                  | 559   | 0.77 * | 616,708.96 | 17    | 0.76   | 38,698.18 | 0    | 0   | 2,647.04 | 29  | 1.23 | 39,848.34 |
| Myeloma                               | 76    | 0.69 * | 121,198.45 | 10    | 0.64   | 28,121.92 | 0    | 0   | 1,085.24 | 4   | 1.03 | 8,877.77  |
| Acute Lymphocytic Leukemia            | 5     | 2.31   | 5,045.63   | 1     | 6.47   | 372.09    | 0    | 0   | 75.82    | 0   | 0    | 612.39    |
| Chronic Lymphocytic Leukemia          | 245   | 0.77 * | 230,998.71 | 4     | 0.39 * | 12,363.99 | 0    | 0   | 562.53   | 2   | 0.64 | 4,372.66  |
| Acute Non-Lymphocytic Leukemia (ANLL) | 7     | 0.48 * | 29,746.48  | 0     | 0      | 2,185.63  | 0    | 0   | 218.36   | 0   | 0    | 2,955.75  |
| Chronic Myeloid Leukemia              | 27    | 0.87   | 35,167.76  | 1     | 0.71   | 3,427.15  | 0    | 0   | 209.19   | 0   | 0    | 2,334.80  |
| Mesothelioma                          | 3     | 0.38   | 8,937.60   | 0     | 0      | 448.93    | 0    | 0   | 70.81    | 0   | 0    | 359.32    |
| Kaposi Sarcoma                        | 25    | 1.34   | 16,845.87  | 2     | 2.4    | 2,192.57  | 0    | 0   | 149.13   | 0   | 0    | 573.29    |

**Table S2.** Analysis of risk of death due to Alzheimer disease in patients diagnosed with cancers at the age < 45 years. Results are shown for cancer sites with at least 100,000 person-years for at least one race. O: number of observed AD deaths; SMR: standardized mortality ratio; N: number of people in the cohort. Color coding: orange—SMR is statistically significant ( $p < 0.05$ ; not adjusted for multiple tests) and higher than 1.

| Cancer Site                              | Time   | White |         |         | Black |        |        | American Indian /Alaska Native |       |       | Asian /Pacific Islander |        |         |
|------------------------------------------|--------|-------|---------|---------|-------|--------|--------|--------------------------------|-------|-------|-------------------------|--------|---------|
|                                          |        | O     | SMR     | N       | O     | SMR    | N      | O                              | SMR   | N     | O                       | SMR    | Persons |
| All Sites                                | 0–11   | 0     | 0       | 347,583 | 1     | 242.41 | 47,745 | 0                              | 0     | 3,970 | 0                       | 0      | 33,787  |
|                                          | 12–59  | 1     | 3.37    | 300,524 | 1     | 50.42  | 37,494 | 0                              | 0     | 3,255 | 0                       | 0      | 27,994  |
|                                          | 60–119 | 2     | 2.49    | 220,198 | 0     | 0      | 23,602 | 0                              | 0     | 2,184 | 1                       | 49.98  | 18,492  |
|                                          | 120+   | 73    | 0.97    | 165,831 | 8     | 1.85   | 16,051 | 0                              | 0     | 1,454 | 0                       | 0      | 12,537  |
|                                          | Total  | 76    | 0.99    | 347,583 | 10    | 2.28   | 47,745 | 0                              | 0     | 3,970 | 1                       | 0.52   | 33,787  |
| All Solid Tumors                         | 0–11   | 0     | 0       | 285,780 | 1     | 284.18 | 37,730 | 0                              | 0     | 3,280 | 0                       | 0      | 28,243  |
|                                          | 12–59  | 0     | 0       | 249,476 | 1     | 58.83  | 29,985 | 0                              | 0     | 2,723 | 0                       | 0      | 23,626  |
|                                          | 60–119 | 2     | 2.77    | 182,911 | 0     | 0      | 18,691 | 0                              | 0     | 1,844 | 1                       | 53.63  | 15,661  |
|                                          | 120+   | 68    | 0.96    | 137,735 | 7     | 1.75   | 12,738 | 0                              | 0     | 1,245 | 0                       | 0      | 10,630  |
| Total                                    | 70     | 0.97  | 285,780 | 9       | 2.21  | 37,730 | 0      | 0                              | 3,280 | 1     | 0.55                    | 28,243 |         |
| All Lymphatic and Hematopoietic Diseases | 0–11   | 0     | 0       | 56,254  | 0     | 0      | 8,699  | 0                              | 0     | 615   | 0                       | 0      | 4,947   |
|                                          | 12–59  | 1     | 36.29   | 47,166  | 0     | 0      | 6,673  | 0                              | 0     | 481   | 0                       | 0      | 3,999   |
|                                          | 60–119 | 0     | 0       | 34,426  | 0     | 0      | 4,299  | 0                              | 0     | 304   | 0                       | 0      | 2,561   |
|                                          | 120+   | 5     | 1.34    | 25,749  | 1     | 5.09   | 2,827  | 0                              | 0     | 179   | 0                       | 0      | 1,714   |
|                                          | Total  | 6     | 1.57    | 56,254  | 1     | 4.89   | 8,699  | 0                              | 0     | 615   | 0                       | 0      | 4,947   |
| Melanoma of the Skin                     | 0–11   | 0     | 0       | 39,871  | 0     | 0      | 168    | 0                              | 0     | 105   | 0                       | 0      | 332     |
|                                          | 12–59  | 0     | 0       | 36,819  | 0     | 0      | 144    | 0                              | 0     | 92    | 0                       | 0      | 297     |
|                                          | 60–119 | 0     | 0       | 29,888  | 0     | 0      | 108    | 0                              | 0     | 69    | 0                       | 0      | 211     |
|                                          | 120+   | 9     | 0.9     | 23,333  | 0     | 0      | 88     | 0                              | 0     | 51    | 0                       | 0      | 160     |

| Cancer Site                | Time   | White |       |        | Black |          |        | American Indian<br>/Alaska Native |     |     | Asian<br>/Pacific Islander |     |         |
|----------------------------|--------|-------|-------|--------|-------|----------|--------|-----------------------------------|-----|-----|----------------------------|-----|---------|
|                            |        | O     | SMR   | N      | O     | SMR      | N      | O                                 | SMR | N   | O                          | SMR | Persons |
| Female Breast              | Total  | 9     | 0.89  | 39,871 | 0     | 0        | 168    | 0                                 | 0   | 105 | 0                          | 0   | 332     |
|                            | 0–11   | 0     | 0     | 60,747 | 0     | 0        | 10,621 | 0                                 | 0   | 602 | 0                          | 0   | 7,527   |
|                            | 12–59  | 0     | 0     | 56,968 | 0     | 0        | 9,649  | 0                                 | 0   | 553 | 0                          | 0   | 6,919   |
|                            | 60–119 | 0     | 0     | 42,375 | 0     | 0        | 6,054  | 0                                 | 0   | 380 | 0                          | 0   | 4,801   |
|                            | 120+   | 23    | 0.95  | 30,482 | 4     | 2.84     | 3,888  | 0                                 | 0   | 240 | 0                          | 0   | 3,093   |
|                            | Total  | 23    | 0.93  | 60,747 | 4     | 2.79     | 10,621 | 0                                 | 0   | 602 | 0                          | 0   | 7,527   |
| Cervix Uteri               | 0–11   | 0     | 0     | 14,463 | 0     | 0        | 2,530  | 0                                 | 0   | 265 | 0                          | 0   | 1,379   |
|                            | 12–59  | 0     | 0     | 13,203 | 0     | 0        | 2,230  | 0                                 | 0   | 234 | 0                          | 0   | 1,218   |
|                            | 60–119 | 0     | 0     | 10,401 | 0     | 0        | 1,595  | 0                                 | 0   | 170 | 0                          | 0   | 872     |
|                            | 120+   | 6     | 1.11  | 8,614  | 1     | 1.38     | 1,313  | 0                                 | 0   | 135 | 0                          | 0   | 671     |
|                            | Total  | 6     | 1.1   | 14,463 | 1     | 1.37     | 2,530  | 0                                 | 0   | 265 | 0                          | 0   | 1,379   |
|                            | 0–11   | 0     | 0     | 20,980 | 0     | 0        | 574    | 0                                 | 0   | 256 | 0                          | 0   | 962     |
| Testis                     | 12–59  | 0     | 0     | 19,542 | 1     | 5,075.03 | 510    | 0                                 | 0   | 230 | 0                          | 0   | 870     |
|                            | 60–119 | 1     | 33.25 | 16,384 | 0     | 0        | 401    | 0                                 | 0   | 169 | 0                          | 0   | 655     |
|                            | 120+   | 2     | 0.78  | 13,297 | 0     | 0        | 301    | 0                                 | 0   | 122 | 0                          | 0   | 494     |
|                            | Total  | 3     | 1.15  | 20,980 | 1     | 26.17    | 574    | 0                                 | 0   | 256 | 0                          | 0   | 962     |
|                            | 0–11   | 0     | 0     | 16,745 | 0     | 0        | 1,746  | 0                                 | 0   | 174 | 0                          | 0   | 1,230   |
| Brain                      | 12–59  | 0     | 0     | 13,777 | 0     | 0        | 1,366  | 0                                 | 0   | 135 | 0                          | 0   | 982     |
|                            | 60–119 | 1     | 92.82 | 8,586  | 0     | 0        | 806    | 0                                 | 0   | 78  | 0                          | 0   | 577     |
|                            | 120+   | 2     | 7.06  | 5,863  | 0     | 0        | 551    | 0                                 | 0   | 53  | 0                          | 0   | 374     |
|                            | Total  | 3     | 10    | 16,745 | 0     | 0        | 1,746  | 0                                 | 0   | 174 | 0                          | 0   | 1,230   |
|                            | 0–11   | 0     | 0     | 30,643 | 0     | 0        | 2,157  | 0                                 | 0   | 367 | 0                          | 0   | 4,098   |
| Thyroid                    | 12–59  | 0     | 0     | 28,680 | 0     | 0        | 1,984  | 0                                 | 0   | 335 | 0                          | 0   | 3,750   |
|                            | 60–119 | 0     | 0     | 22,984 | 0     | 0        | 1,520  | 0                                 | 0   | 257 | 0                          | 0   | 2,832   |
|                            | 120+   | 7     | 1.05  | 16,989 | 0     | 0        | 1,030  | 0                                 | 0   | 171 | 0                          | 0   | 1,999   |
|                            | Total  | 7     | 1.04  | 30,643 | 0     | 0        | 2,157  | 0                                 | 0   | 367 | 0                          | 0   | 4,098   |
|                            | 0–11   | 0     | 0     | 16,455 | 0     | 0        | 2,138  | 0                                 | 0   | 74  | 0                          | 0   | 784     |
| Hodgkin Lymphoma           | 12–59  | 0     | 0     | 15,583 | 0     | 0        | 1,931  | 0                                 | 0   | 62  | 0                          | 0   | 724     |
|                            | 60–119 | 0     | 0     | 12,927 | 0     | 0        | 1,433  | 0                                 | 0   | 49  | 0                          | 0   | 529     |
|                            | 120+   | 1     | 0.96  | 10,376 | 0     | 0        | 1,031  | 0                                 | 0   | 30  | 0                          | 0   | 351     |
|                            | Total  | 1     | 0.94  | 16,455 | 0     | 0        | 2,138  | 0                                 | 0   | 74  | 0                          | 0   | 784     |
|                            | 0–11   | 0     | 0     | 19,467 | 0     | 0        | 3,475  | 0                                 | 0   | 174 | 0                          | 0   | 1,782   |
| Non-Hodgkin Lymphoma       | 12–59  | 1     | 70.57 | 15,135 | 0     | 0        | 2,372  | 0                                 | 0   | 125 | 0                          | 0   | 1,411   |
|                            | 60–119 | 0     | 0     | 11,090 | 0     | 0        | 1,567  | 0                                 | 0   | 86  | 0                          | 0   | 943     |
|                            | 120+   | 4     | 1.95  | 8,080  | 1     | 9.53     | 1,007  | 0                                 | 0   | 46  | 0                          | 0   | 642     |
|                            | Total  | 5     | 2.38  | 19,467 | 1     | 9.19     | 3,475  | 0                                 | 0   | 174 | 0                          | 0   | 1,782   |
| Acute Lymphocytic Leukemia | 0–11   | 0     | 0     | 8,941  | 0     | 0        | 851    | 0                                 | 0   | 188 | 0                          | 0   | 1,023   |
|                            | 12–59  | 0     | 0     | 7,795  | 0     | 0        | 715    | 0                                 | 0   | 154 | 0                          | 0   | 872     |

| Cancer Site | Time | White  |       |       | Black |     |     | American Indian /Alaska Native |     |     | Asian /Pacific Islander |     |         |
|-------------|------|--------|-------|-------|-------|-----|-----|--------------------------------|-----|-----|-------------------------|-----|---------|
|             |      | O      | SMR   | N     | O     | SMR | N   | O                              | SMR | N   | O                       | SMR | Persons |
|             |      | 60–119 | 0     | 0     | 5,423 | 0   | 0   | 440                            | 0   | 0   | 92                      | 0   | 0       |
| 120+        | 0    | 0      | 4,056 | 0     | 0     | 305 | 0   | 0                              | 67  | 0   | 0                       | 415 |         |
| Total       |      | 0      | 0     | 8,941 | 0     | 0   | 851 | 0                              | 0   | 188 | 0                       | 0   | 1,023   |

**Table S3.** Characteristics of cases of AD deaths in patients of black race diagnosed with cancers at < 45 years of age.

|                                                                       | Number of Cases | Female           | Male             |
|-----------------------------------------------------------------------|-----------------|------------------|------------------|
|                                                                       |                 |                  |                  |
| Primary cancer site                                                   | Stomach         | 7                | 3                |
|                                                                       | Colon           | 0                | 1                |
|                                                                       | Breast          | 1                | 0                |
|                                                                       | Cervix uteri    | 4                | 0                |
|                                                                       | Testis          | 1                | 0                |
|                                                                       | Spinal cord     | 0                | 1                |
|                                                                       | Lymphoma        | 1                | 1                |
| Radiation therapy                                                     | Beam radiation  | 1                | 2                |
|                                                                       | None/Unknown    | 6                | 1                |
| Chemotherapy                                                          | No/Unknown      | 7                | 1                |
|                                                                       | Yes             | 0                | 2                |
| Survival [months]: Median (range)                                     |                 | 363 (242–439)    | 12 (0–248)       |
| Age at AD death [months]<br>Median (range)                            |                 | 839 (646–907)    | 443 (344–739)    |
| Age at cancer diagnosis<br>Median (range)                             |                 | 37 (28–44)       | 36 (27–40)       |
| Year of cancer diagnosis<br>Median (range)                            |                 | 1981 (1976–1993) | 2007 (1982–2008) |
| Time between cancer diagnosis and AD death [months]<br>Median (range) |                 | 364 (243–440)    | 12 (1–249)       |

**Table S4.** Cohort characteristics of breast cancer patients of white race from SEER 13 registry included in the analysis of the influence of chemotherapy on the Alzheimer disease death rate.

| Age at Cancer Diagnosis [years] | Chemotherapy Status | O   | Persons | PYR [years] | Mean PYR [years] | Mean Age at BC Diagnosis [years] | Mean Year of BC Diagnosis | Mean Age at AD Death [years] | Mean Year of AD Death |
|---------------------------------|---------------------|-----|---------|-------------|------------------|----------------------------------|---------------------------|------------------------------|-----------------------|
| 65–69                           | No/Unknown          | 262 | 24,703  | 204,284.32  | 8.27             | 67.46                            | 2004.74                   | 82.62                        | 2011.95               |
|                                 | Yes                 | 47  | 10,286  | 67,058.92   | 6.52             | 67.28                            | 2006.84                   | 82.1                         | 2012.55               |

|       |            |     |        |            |      |       |         |       |         |
|-------|------------|-----|--------|------------|------|-------|---------|-------|---------|
| 70–74 | No/Unknown | 514 | 23,885 | 188,234.58 | 7.88 | 72.47 | 2003.78 | 86.25 | 2011.27 |
|       | Yes        | 57  | 6,182  | 36,944.21  | 5.98 | 72.28 | 2006.56 | 85.69 | 2012.33 |
| 75–79 | No/Unknown | 635 | 21,724 | 151,796.92 | 6.99 | 77.44 | 2003.55 | 88.09 | 2010.16 |
|       | Yes        | 42  | 3,191  | 16,912.76  | 5.3  | 77.16 | 2006.23 | 87.56 | 2011.95 |
| 80–84 | No/Unknown | 633 | 16,205 | 91,108.44  | 5.62 | 82.33 | 2003.83 | 90.59 | 2009.38 |
|       | Yes        | 21  | 1,179  | 5,000.25   | 4.24 | 82.05 | 2006.41 | 90.86 | 2009.2  |
| 85–89 | No/Unknown | 362 | 9,267  | 39,982.07  | 4.31 | 87.16 | 2004.38 | 93.14 | 2008.77 |
|       | Yes        | 5   | 293    | 855.45     | 2.92 | 86.96 | 2007.29 | 93.07 | 2008.79 |
| 90–94 | No/Unknown | 110 | 3,261  | 9,906.86   | 3.04 | 92.02 | 2004.88 | 96.47 | 2008.66 |
|       | Yes        | 0   | 57     | 124.03     | 2.18 | 91.72 | 2006.6  | -     | -       |
| 95–99 | No/Unknown | 25  | 640    | 1,515.16   | 2.37 | 96.72 | 2005.3  | 99.2  | 2008.23 |
|       | Yes        | 0   | 8      | 25.25      | 3.16 | 96.42 | 2004.23 | -     | -       |

**Table S5.** Cohort characteristics of breast cancer patients of white race from SEER 13 registry included in the analysis of the influence of radiation therapy on the Alzheimer disease death rate. O: number of AD deaths in the cohort, N: number of BC patients in the cohort; PYR: accumulated person-years at risk, BC: breast cancer, AD: Alzheimer disease.

| Age at Cancer Diagnosis [years] | Radiation Therapy Status | O   | N      | PYR [years] | Mean PYR [years] | Mean Age at BC Diagnosis [years] | Mean Year of BC Diagnosis | Mean Age at AD Death [years] | Mean Year of AD Death |
|---------------------------------|--------------------------|-----|--------|-------------|------------------|----------------------------------|---------------------------|------------------------------|-----------------------|
| 65–69                           | Beam                     | 143 | 18,787 | 147,905.62  | 7.87             | 67.4                             | 2006.1                    | 82.5                         | 2012.4                |
|                                 | No                       | 160 | 14,420 | 113,268.77  | 7.85             | 67.43                            | 2004.0                    | 82.69                        | 2011.7                |
|                                 | Other                    | 6   | 1,782  | 10,168.85   | 5.71             | 67.38                            | 2009.2                    | 79.68                        | 2011.3                |
| 70–74                           | Beam                     | 259 | 14,888 | 115,162.63  | 7.74             | 72.4                             | 2004.9                    | 86.63                        | 2012.1                |
|                                 | No                       | 300 | 13,900 | 102,957.78  | 7.41             | 72.47                            | 2003.3                    | 85.91                        | 2010.7                |
|                                 | Other                    | 12  | 1,279  | 7,058.37    | 5.52             | 72.42                            | 2009.0                    | 83.91                        | 2013.0                |
| 75–79                           | Beam                     | 294 | 10,769 | 78,843.06   | 7.32             | 77.35                            | 2004.5                    | 88.45                        | 2010.9                |
|                                 | No                       | 370 | 13,140 | 84,507.88   | 6.43             | 77.45                            | 2003.1                    | 87.79                        | 2009.7                |
|                                 | Other                    | 13  | 1,006  | 5,358.74    | 5.33             | 77.3                             | 2008.3                    | 86.88                        | 2013.1                |
| 80–84                           | Beam                     | 217 | 5,897  | 36,808.80   | 6.24             | 82.17                            | 2004.7                    | 91.69                        | 2010.7                |
|                                 | No                       | 421 | 10,963 | 56,738.00   | 5.18             | 82.39                            | 2003.4                    | 90.05                        | 2008.6                |
|                                 | Other                    | 16  | 524    | 2,561.89    | 4.89             | 82.22                            | 2007.8                    | 90.45                        | 2012.4                |
| 85–89                           | Beam                     | 58  | 1,948  | 10,109.72   | 5.19             | 86.89                            | 2005.2                    | 94.79                        | 2010.4                |
|                                 | No                       | 304 | 7,358  | 29,711.60   | 4.04             | 87.23                            | 2004.2                    | 92.81                        | 2008.4                |
|                                 | Other                    | 5   | 254    | 1,016.19    | 4                | 86.84                            | 2007.3                    | 93.85                        | 2012.6                |
| 90–94                           | Beam                     | 10  | 329    | 1,193.49    | 3.63             | 91.72                            | 2005.6                    | 97.23                        | 2009.2                |
|                                 | No                       | 99  | 2,943  | 8,678.73    | 2.95             | 92.06                            | 2004.8                    | 96.37                        | 2008.5                |
|                                 | Other                    | 1   | 46     | 158.68      | 3.45             | 91.44                            | 2006.9                    | 98.9                         | 2016.5                |
| 95–99                           | Beam                     | 1   | 26     | 52.9        | 2.03             | 96.39                            | 2008.6                    | 98.42                        | 2012.6                |
|                                 | No                       | 24  | 619    | 1,482.85    | 2.4              | 96.72                            | 2005.1                    | 99.23                        | 2008.0                |
|                                 | Other                    | 0   | 3      | 4.66        | 1.55             | 97.67                            | 2007.2                    | -                            | -                     |

**Table S6.** Risk of AD death in breast cancer patients relative to the reference population stratified by chemotherapy status. Cohort includes white female breast cancer patients from SEER 13 registry diagnosed at 65+ years (5-year age groups). Data shown for age groups that accumulated at least 100,000 person-years in at least one stratum. O: number of AD deaths in the cohort, SMR: standardized mortality rate (CI Lower and CI upper CI95 lower and upper bound CI95 values, respectively); N: number of BC patients in the cohort; PYR: accumulated person-years at risk; BC: breast cancer. Color coding: Significantly decreased (green) or increased (orange) risk at  $p < 0.05$  (not adjusted for multiple tests).

| Age Group [Years] | Time since BC Diagnosis [Months] | Chemotherapy status: No/Unknown |        |          |          |        |            | Chemotherapy Status: Yes |        |          |          |        |           |
|-------------------|----------------------------------|---------------------------------|--------|----------|----------|--------|------------|--------------------------|--------|----------|----------|--------|-----------|
|                   |                                  | O                               | SMR    | CI Lower | CI Upper | N      | PYR        | O                        | SMR    | CI Lower | CI Upper | N      | PYR       |
| 65–69             | 0–5                              | 1                               | 0.83   | 0.02     | 4.64     | 24,703 | 11,750.58  | 0                        | 0      | 0        | 7.05     | 10,286 | 4,866.55  |
|                   | 6–11                             | 1                               | 0.73   | 0.02     | 4.04     | 22,937 | 11,189.02  | 0                        | 0      | 0        | 6.45     | 9,435  | 4,555.06  |
|                   | 12–59                            | 10                              | 0.62   | 0.3      | 1.15     | 21,925 | 73,196.83  | 3                        | 0.48   | 0.1      | 1.41     | 8,870  | 27,540.52 |
|                   | 60–119                           | 45                              | 1.13   | 0.82     | 1.51     | 15,001 | 58,042.36  | 7                        | 0.55   | 0.22     | 1.13     | 5,216  | 18,692.75 |
|                   | 120–179                          | 58                              | 0.87   | 0.66     | 1.13     | 8,748  | 32,535.49  | 14                       | 0.83   | 0.45     | 1.39     | 2,541  | 8,484.71  |
|                   | 180–239                          | 95                              | 0.98   | 0.8      | 1.2      | 4,550  | 14,550.83  | 14                       | 0.88   | 0.48     | 1.47     | 1,000  | 2,547.25  |
|                   | 240+                             | 52                              | 1.35 * | 1.01     | 1.77     | 1,511  | 3,019.21   | 9                        | 1.89   | 0.87     | 3.59     | 184    | 372.09    |
|                   | Total                            | 262                             | 1.01   | 0.89     | 1.14     | 24,703 | 204,284.32 | 47                       | 0.82   | 0.6      | 1.08     | 10,286 | 67,058.92 |
| 70–74             | 0–5                              | 0                               | 0      | 0        | 1.03     | 23,885 | 11,349.30  | 0                        | 0      | 0        | 3.65     | 6,182  | 2,899.46  |
|                   | 6–11                             | 1                               | 0.25   | 0.01     | 1.37     | 22,118 | 10,806.14  | 0                        | 0      | 0        | 3.38     | 5,593  | 2,692.41  |
|                   | 12–59                            | 27                              | 0.57 * | 0.37     | 0.82     | 21,204 | 70,212.48  | 1                        | 0.09 * | 0        | 0.5      | 5,224  | 15,751.00 |
|                   | 60–119                           | 99                              | 0.94   | 0.77     | 1.15     | 14,379 | 55,013.48  | 13                       | 0.68   | 0.36     | 1.16     | 2,912  | 10,126.74 |
|                   | 120–179                          | 172                             | 0.93   | 0.79     | 1.07     | 8,111  | 28,738.00  | 26                       | 1.01   | 0.66     | 1.48     | 1,310  | 4,170.10  |
|                   | 180–239                          | 173                             | 1.40 * | 1.2      | 1.62     | 3,696  | 10,546.58  | 10                       | 0.7    | 0.33     | 1.28     | 463    | 1,187.94  |
|                   | 240+                             | 42                              | 2.12 * | 1.53     | 2.86     | 853    | 1,568.60   | 7                        | 4.65 * | 1.87     | 9.59     | 75     | 116.57    |
|                   | Total                            | 514                             | 1.05   | 0.96     | 1.14     | 23,885 | 188,234.58 | 57                       | 0.77 * | 0.58     | 1        | 6,182  | 36,944.21 |
| 75–79             | 0–5                              | 2                               | 0.20 * | 0.02     | 0.74     | 21,724 | 10,251.39  | 0                        | 0      | 0        | 2.32     | 3,191  | 1,494.92  |
|                   | 6–11                             | 7                               | 0.65   | 0.26     | 1.34     | 19,947 | 9,703.96   | 0                        | 0      | 0        | 2.24     | 2,878  | 1,373.10  |
|                   | 12–59                            | 76                              | 0.65 * | 0.51     | 0.82     | 19,031 | 62,424.94  | 7                        | 0.48 * | 0.19     | 0.98     | 2,648  | 7,629.28  |
|                   | 60–119                           | 211                             | 0.78 * | 0.68     | 0.89     | 12,437 | 45,121.36  | 12                       | 0.46 * | 0.24     | 0.81     | 1,339  | 4,517.46  |
|                   | 120–179                          | 225                             | 1.06   | 0.92     | 1.2      | 6,007  | 19,036.49  | 15                       | 0.81   | 0.45     | 1.34     | 549    | 1,591.39  |
|                   | 180–239                          | 102                             | 1.78 * | 1.45     | 2.16     | 2,063  | 4,869.26   | 7                        | 2      | 0.8      | 4.11     | 144    | 288.12    |
|                   | 240+                             | 12                              | 2.43 * | 1.25     | 4.24     | 266    | 389.51     | 1                        | 4.36   | 0.11     | 24.31    | 15     | 18.49     |
|                   | Total                            | 635                             | 0.93   | 0.86     | 1        | 21,724 | 151,796.92 | 42                       | 0.64 * | 0.46     | 0.86     | 3,191  | 16,912.76 |

**Table S7.** Risk of AD death in breast cancer patients relative to the reference population stratified by radiotherapy status (group “other” was not included). Cohort includes white female breast cancer patients from SEER 13 registry diagnosed at 65+ years (5-year age groups). Data shown for age groups that accumulated at least 100,000 person-years in at least one stratum. O: number of AD deaths in the cohort, SMR: standardized mortality rate (CI Lower and CI upper CI95 lower and upper bound CI95 values, respectively); N: number of BC patients in the cohort; PYR: accumulated person-years at risk; BC: breast cancer. Color coding: Significantly decreased (green) or increased (orange) risk at  $p < 0.05$  (not adjusted for multiple tests).

| Age Group [Years] | Time since BC Diagnosis [months] | Radiotherapy: Beam |        |          |          |        |            | Radiotherapy: No/Unknown |        |          |          |        |            |
|-------------------|----------------------------------|--------------------|--------|----------|----------|--------|------------|--------------------------|--------|----------|----------|--------|------------|
|                   |                                  | O                  | SMR    | CI Lower | CI Upper | N      | PYR        | O                        | SMR    | CI Lower | CI Upper | N      | PYR        |
| 65–69             | 0–5                              | 0                  | 0      | 0        | 3.84     | 18,787 | 9,050.61   | 1                        | 1.5    | 0.04     | 8.36     | 14,420 | 6,718.96   |
|                   | 6–11                             | 0                  | 0      | 0        | 3.38     | 17,661 | 8,608.29   | 1                        | 1.33   | 0.03     | 7.41     | 13,065 | 6,342.48   |
|                   | 12–59                            | 5                  | 0.40 * | 0.13     | 0.94     | 16,829 | 55,232.62  | 8                        | 0.92   | 0.4      | 1.82     | 12,424 | 40,822.51  |
|                   | 60–119                           | 27                 | 0.92   | 0.61     | 1.34     | 11,073 | 42,255.52  | 24                       | 1.12   | 0.72     | 1.67     | 8,287  | 31,753.75  |
|                   | 120–179                          | 33                 | 0.72   | 0.5      | 1.01     | 6,244  | 22,442.74  | 35                       | 0.97   | 0.67     | 1.35     | 4,742  | 17,745.14  |
|                   | 180–239                          | 54                 | 0.94   | 0.7      | 1.22     | 2,979  | 8,838.28   | 54                       | 1.01   | 0.76     | 1.32     | 2,483  | 8,011.01   |
|                   | 240+                             | 24                 | 1.26   | 0.81     | 1.88     | 808    | 1,477.56   | 37                       | 1.56 * | 1.1      | 2.14     | 869    | 1,874.91   |
|                   | Total                            | 143                | 0.86   | 0.73     | 1.01     | 18,787 | 147,905.62 | 160                      | 1.1    | 0.94     | 1.29     | 14,420 | 113,268.77 |
| 70–74             | 0–5                              | 0                  | 0      | 0        | 1.56     | 14,888 | 7,172.66   | 0                        | 0      | 0        | 1.85     | 13,900 | 6,472.39   |
|                   | 6–11                             | 0                  | 0      | 0        | 1.38     | 14,003 | 6,837.75   | 1                        | 0.45   | 0.01     | 2.49     | 12,548 | 6,099.83   |
|                   | 12–59                            | 6                  | 0.19 * | 0.07     | 0.42     | 13,377 | 44,130.31  | 22                       | 0.87   | 0.55     | 1.32     | 11,956 | 38,534.77  |
|                   | 60–119                           | 46                 | 0.71 * | 0.52     | 0.94     | 8,945  | 33,670.93  | 59                       | 1.06   | 0.81     | 1.37     | 7,744  | 29,617.35  |
|                   | 120–179                          | 95                 | 0.87   | 0.7      | 1.06     | 4,866  | 16,879.83  | 101                      | 1.02   | 0.83     | 1.24     | 4,363  | 15,445.19  |
|                   | 180–239                          | 95                 | 1.39 * | 1.12     | 1.7      | 2,101  | 5,761.97   | 85                       | 1.25 * | 1        | 1.55     | 1,990  | 5,825.90   |
|                   | 240+                             | 17                 | 1.88 * | 1.1      | 3.01     | 418    | 709.18     | 32                       | 2.63 * | 1.8      | 3.72     | 503    | 962.35     |
|                   | Total                            | 259                | 0.9    | 0.79     | 1.02     | 14,888 | 115,162.63 | 300                      | 1.14 * | 1.01     | 1.27     | 13,900 | 102,957.78 |

**Table S8.** Cohort characteristics of breast cancer patients from SEER 9 registry included in the analysis of the influence of radiotherapy, chemotherapy and demographic/clinical variables on the Alzheimer disease death rate. O: number of AD deaths in the cohort, N: number of BC patients in the cohort; PYR: accumulated person-years at risk, BC: breast cancer, AD: Alzheimer disease.

| Characteristics                    | AIAN         | API         | B           | W           |
|------------------------------------|--------------|-------------|-------------|-------------|
| Total number of tumors for patient | 1            | 1930        | 26924       | 31423       |
|                                    | 2–14         | 237         | 3992        | 4765        |
| Chemotherapy                       | None/Unknown | 1138        | 18034       | 19364       |
|                                    | Yes          | 1029        | 12882       | 16824       |
| Radiation therapy                  | Beam         | 1012        | 15902       | 16421       |
|                                    | None/Unknown | 1066        | 14395       | 18121       |
|                                    | Other        | 89          | 619         | 1646        |
| Age at diagnosis [years]           | 55 (24–103)  | 56 (18–104) | 56 (18–107) | 61 (15–107) |

|                                            |                   |                   |                   |                   |
|--------------------------------------------|-------------------|-------------------|-------------------|-------------------|
| Year of diagnosis: median (range)          | 2005 (1975–2016)  | 2005 (1975–2016)  | 2002 (1975–2016)  | 1998 (1975–2016)  |
| Year of last follow-up: median (range)     | 2016 (1979–2016)  | 2016 (1975–2016)  | 2014 (1975–2016)  | 2013 (1975–2016)  |
| PTY [years]                                | 5.88 (0.08–40.33) | 6.80 (0.08–41.80) | 5.30 (0.08–41.88) | 7.55 (0.08–41.88) |
| Number of AD deaths                        | 6                 | 128               | 141               | 3619              |
| Age at AD death [months]<br>Median (range) | 1008 (846–1113)   | 1080 (786–1245)   | 1054 (724–1264)   | 1064 (679–1274)   |
| Time between BC and AD death [months]      | 199 (23–318)      |                   | 176 (3–459)       | 160 (2–497)       |

**Table S9.** Status of strata in Cox model of AD death hazard in women diagnosed with breast cancer at  $\geq 45$  years of age. The model was stratified on age at cancer diagnosis and used race as a single variable.

| Stratum<br>(Age at diagnosis) | Event | Censored | Censored [%] |
|-------------------------------|-------|----------|--------------|
| 1 (45–54 yrs.)                | 158   | 55868    | 99.7%        |
| 2 (55–64 yrs.)                | 594   | 95002    | 99.4%        |
| 3 (65–74 yrs.)                | 1277  | 80557    | 98.4%        |
| 4 (75–84 yrs.)                | 1406  | 50520    | 97.3%        |
| 5 (85+ yrs.)                  | 441   | 15496    | 97.2%        |
| Total                         | 3876  | 297443   | 98.7%        |

**Table S10.** Status of variable in Cox model of AD death hazard in women diagnosed with breast cancer at  $\geq 45$  years of age. The model was stratified on age at cancer diagnosis and used race as a single variable.

| Race<br>Variable<br>(levels) | Event | Censored | Censored [%] |
|------------------------------|-------|----------|--------------|
| AIAN                         | 6     | 1388     | 99.6%        |
| API                          | 128   | 21989    | 99.4%        |
| B                            | 139   | 28036    | 99.5%        |
| W                            | 3603  | 278489   | 98.7%        |
| Total                        | 3876  | 329902   | 98.8%        |

**Table S11.** Test for proportionality of hazards violation for Cox model of AD death hazard in women diagnosed with breast cancer at  $\geq 45$  years of age. The model was stratified on age at cancer diagnosis and used race as a single variable. Rho: correlation coefficient for scaled Schoenfeld vs log(time).

| Variable  | Rho      | Chisq | p-value |
|-----------|----------|-------|---------|
| Race:AIAN | 0.01390  | 0.749 | 0.3869  |
| Race:API  | −0.00514 | 0.103 | 0.7487  |
| Race:B    | 0.03252  | 4.099 | 0.0429  |
| Global    | N/A      | 4.979 | 0.1733  |

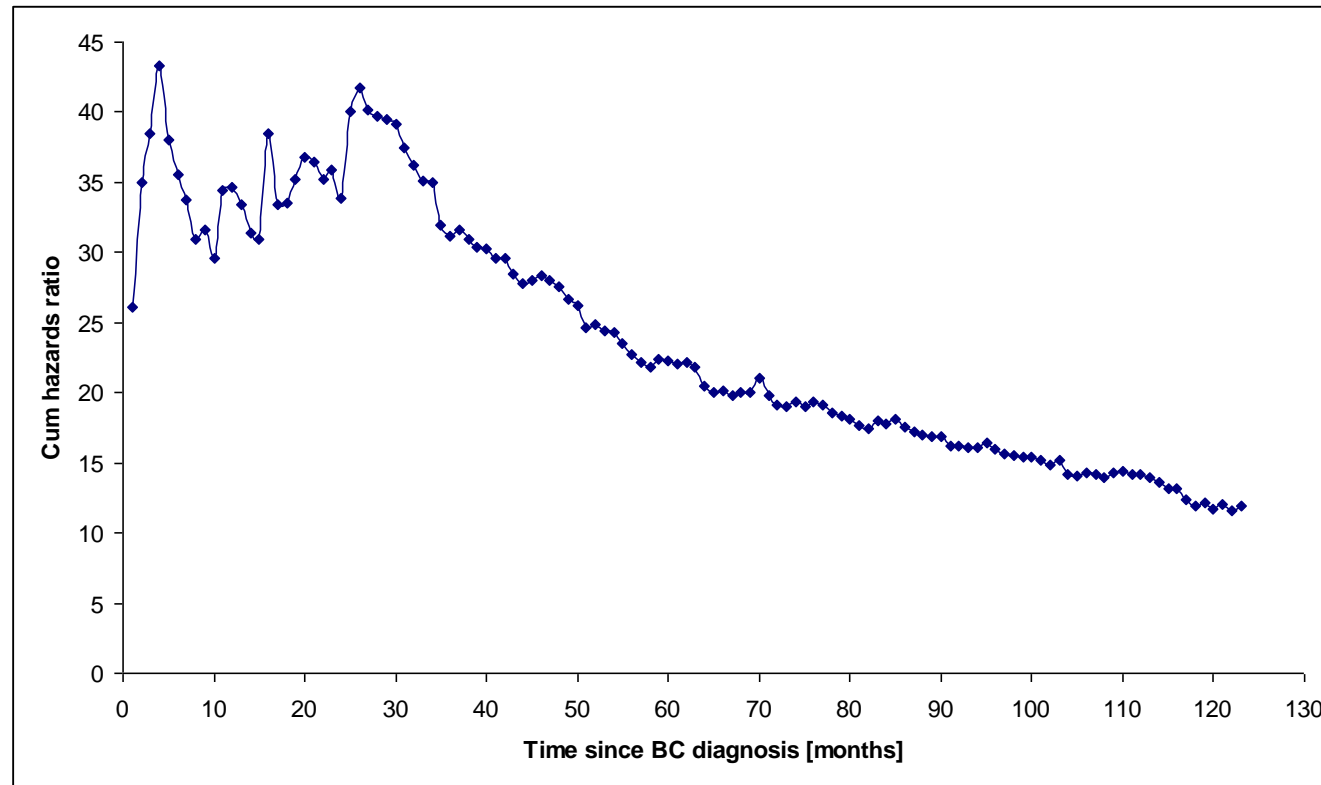

**Figure S1.** Cumulative hazards ratio of AD death between age groups 5 (85+ years) and 3 (65–74 years). Determined for women of all races diagnosed with breast cancers at  $\geq 45$  years of age.



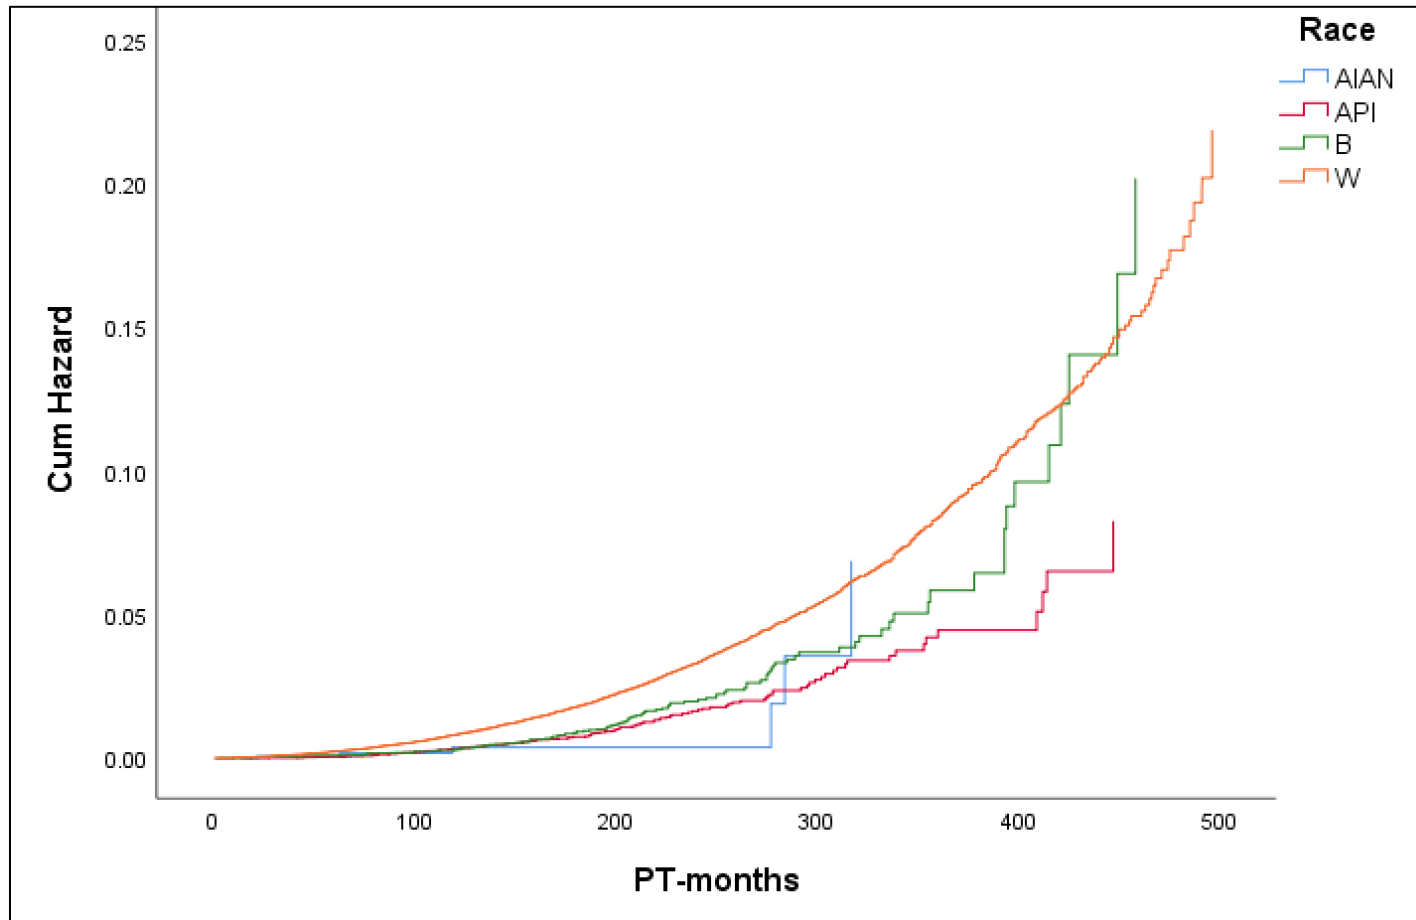

**Figure S2.** Baseline cumulative hazards of AD death in patients diagnosed with breast cancer at  $\geq 45$  years vs. time since cancer diagnosis (PT-months), stratified by race: AIAN (American Indian/Alaska Native), API (Asian/Pacific Islander), B (black), W (white).

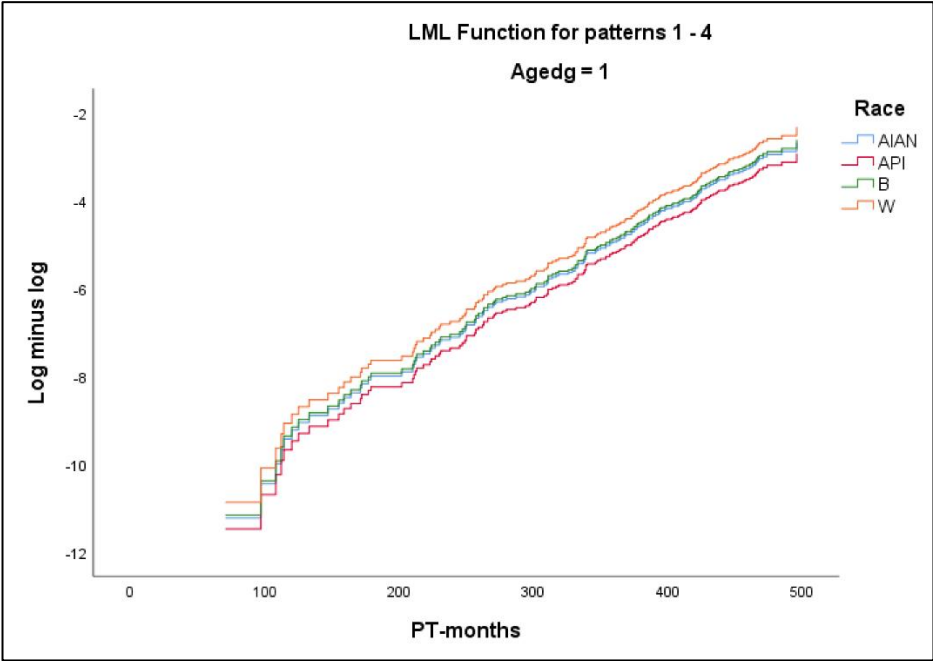

Figure S3. Log(-log survival) curves for AD death in women diagnosed with breast cancer at 45+ years. Cox model with variable race stratified on five 10-year age groups. Age group 45–54 yrs.

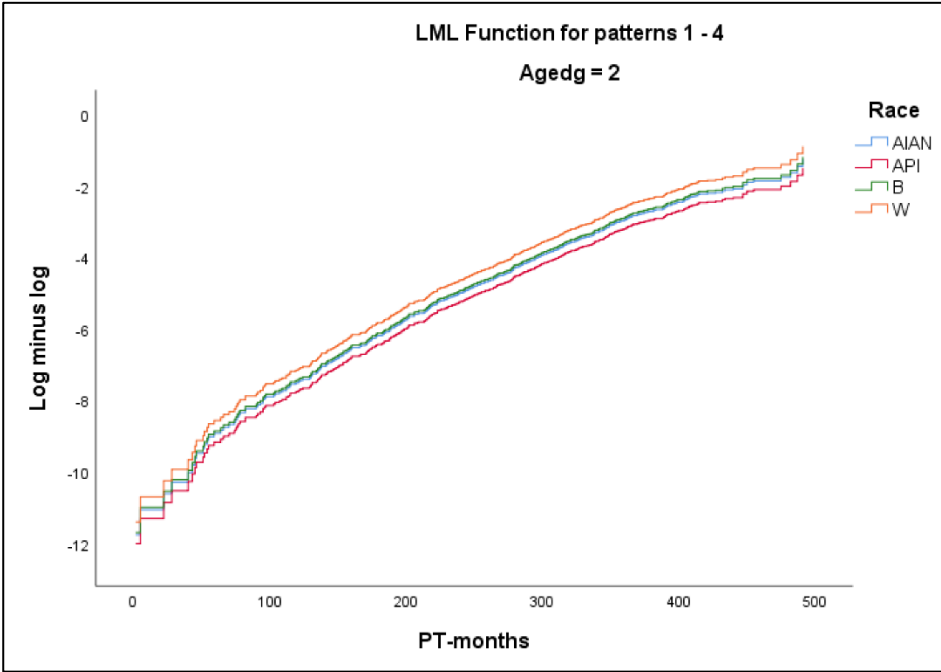

Figure S4. Log(-log survival) curves for AD death in women diagnosed with breast cancer at 45+ years. Cox model with variable race stratified on five 10-year age groups. Age group 55–64 yrs.

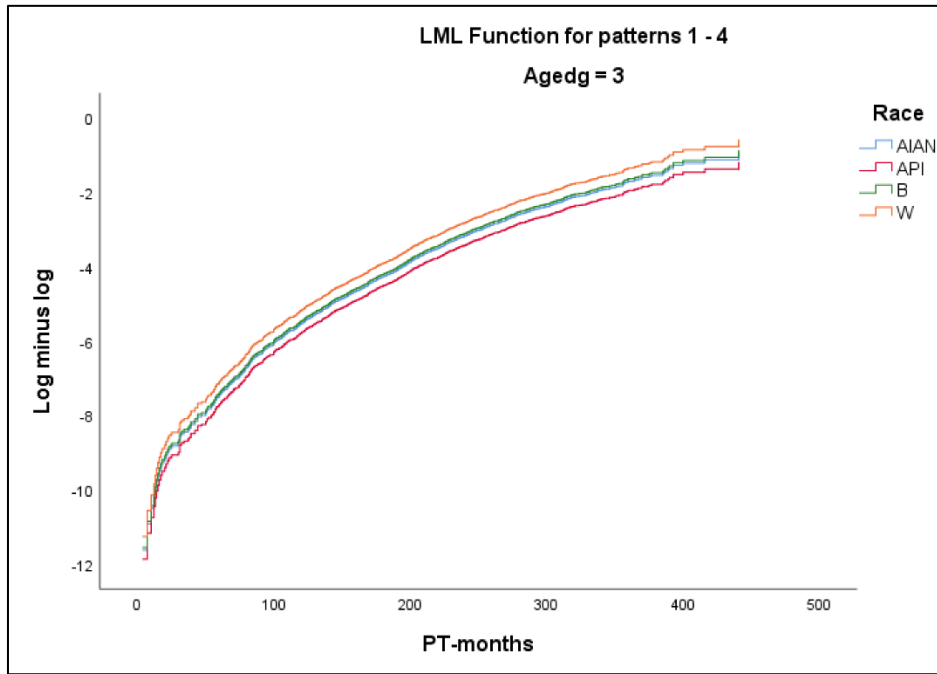

**Figure S5.** Log(-log survival) curves for AD death in women diagnosed with breast cancer at 45+ years. Cox model with variable race stratified on five 10-year age groups. Age group 65–74 yrs.

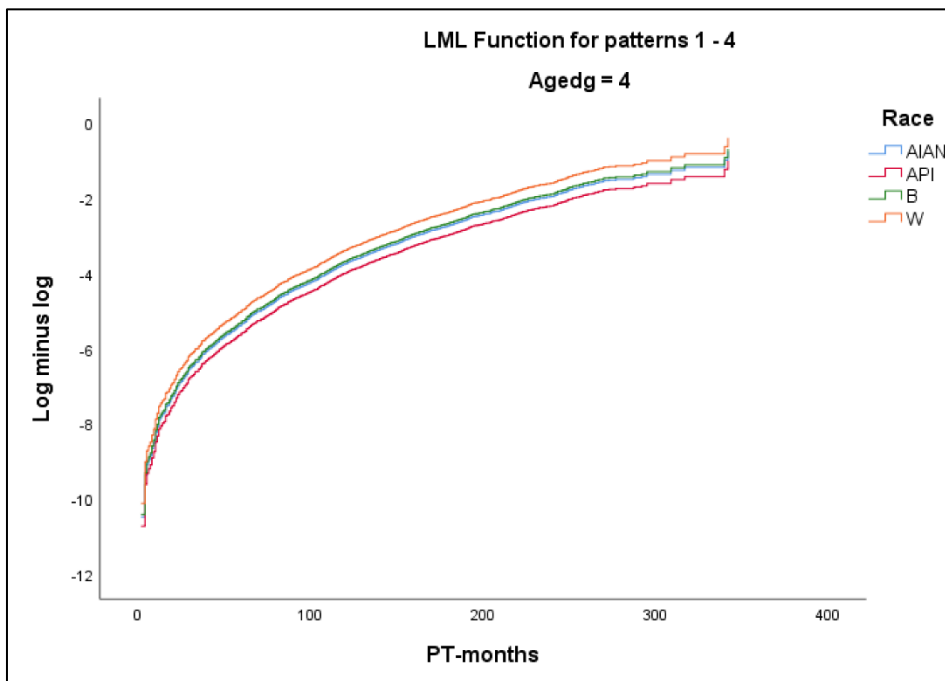

**Figure S6.** Log(-log survival) curves for AD death in women diagnosed with breast cancer at 45+ years. Cox model with variable race stratified on five 10-year age groups. Age group 75–84 yrs.

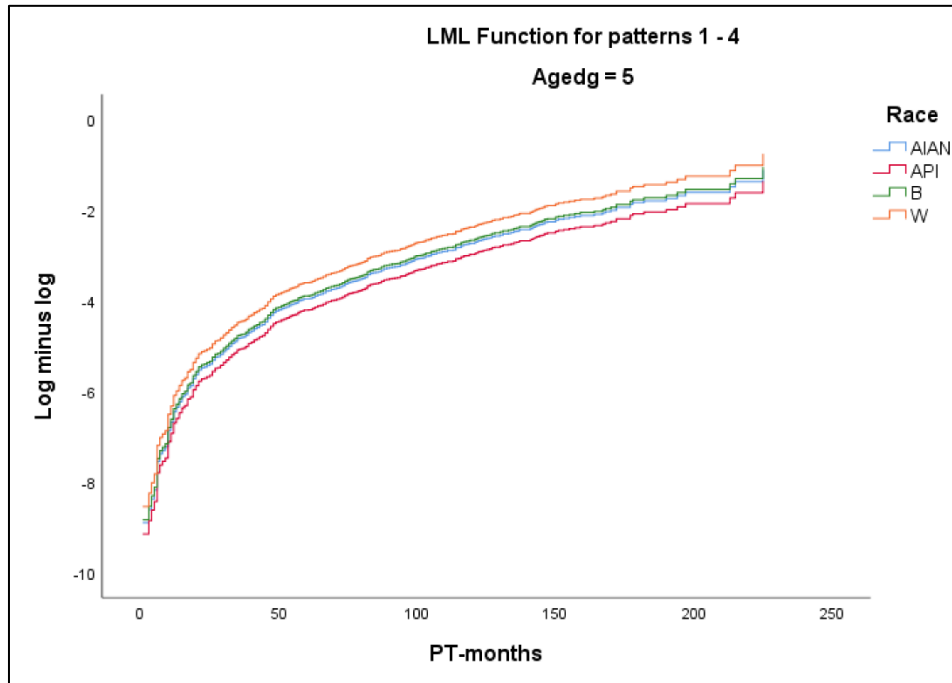

**Figure S7.** Log(-log survival) curves for AD death in women diagnosed with breast cancer at 45+ years. Cox model with variable race stratified on five 10-year age groups. Age group 85+ yrs.

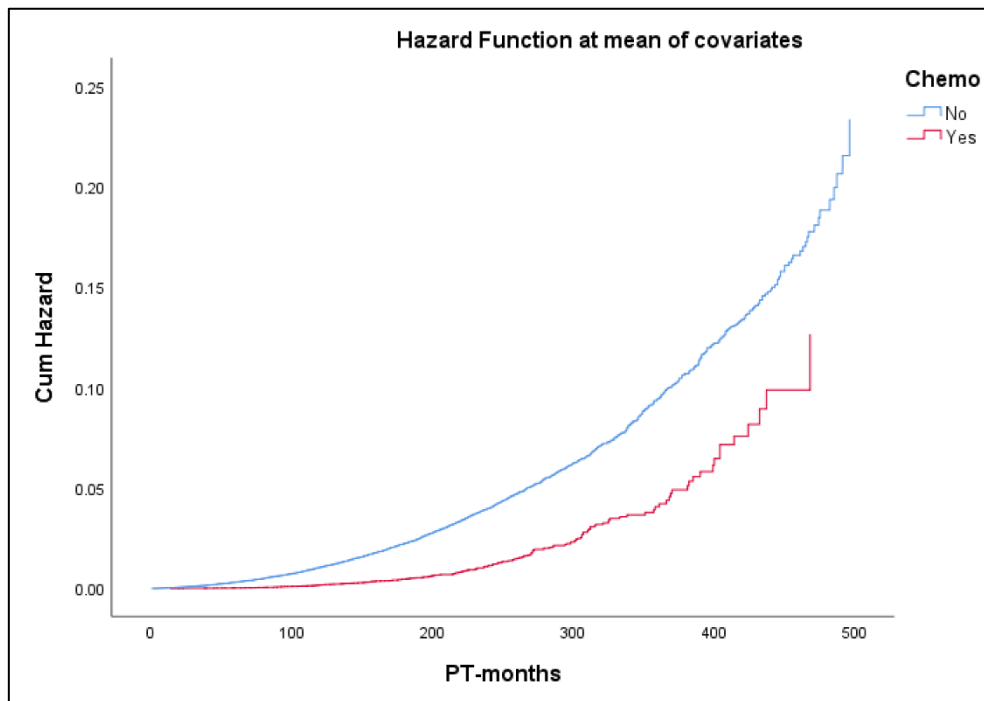

**Figure S8.** Baseline cumulative hazard curves for AD death in white women diagnosed with breast cancer at 45+ years. Cox model stratified on chemotherapy status.

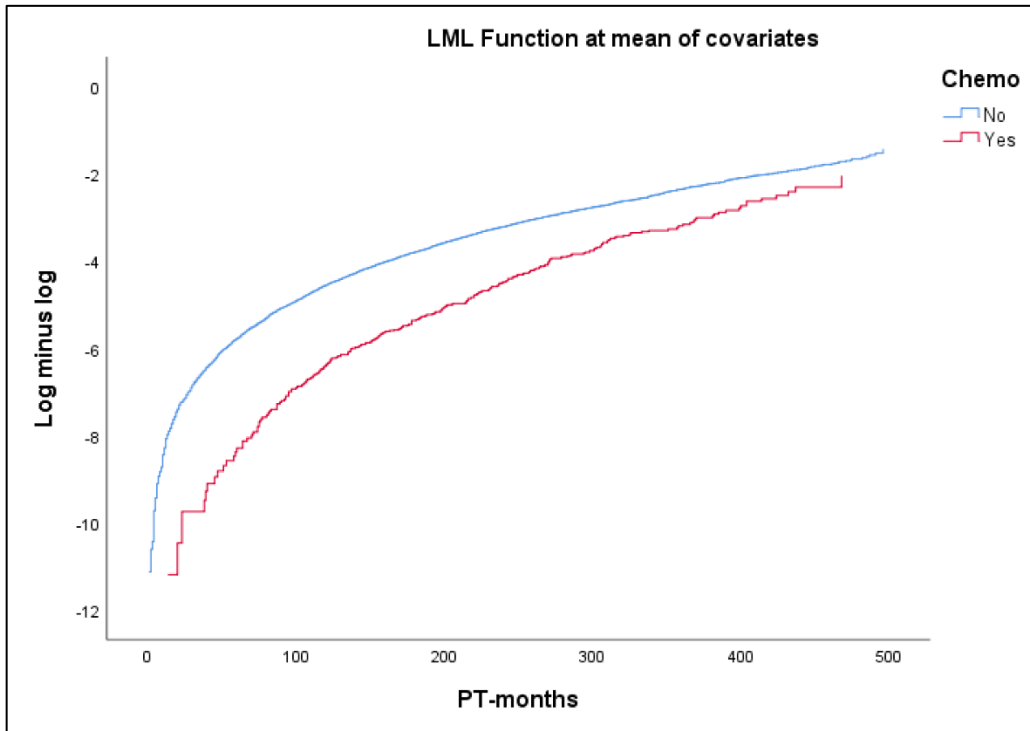

Figure S9. Log(-log survival) curves for AD death in white women diagnosed with breast cancer at 45+ years. Cox model stratified on chemotherapy status.

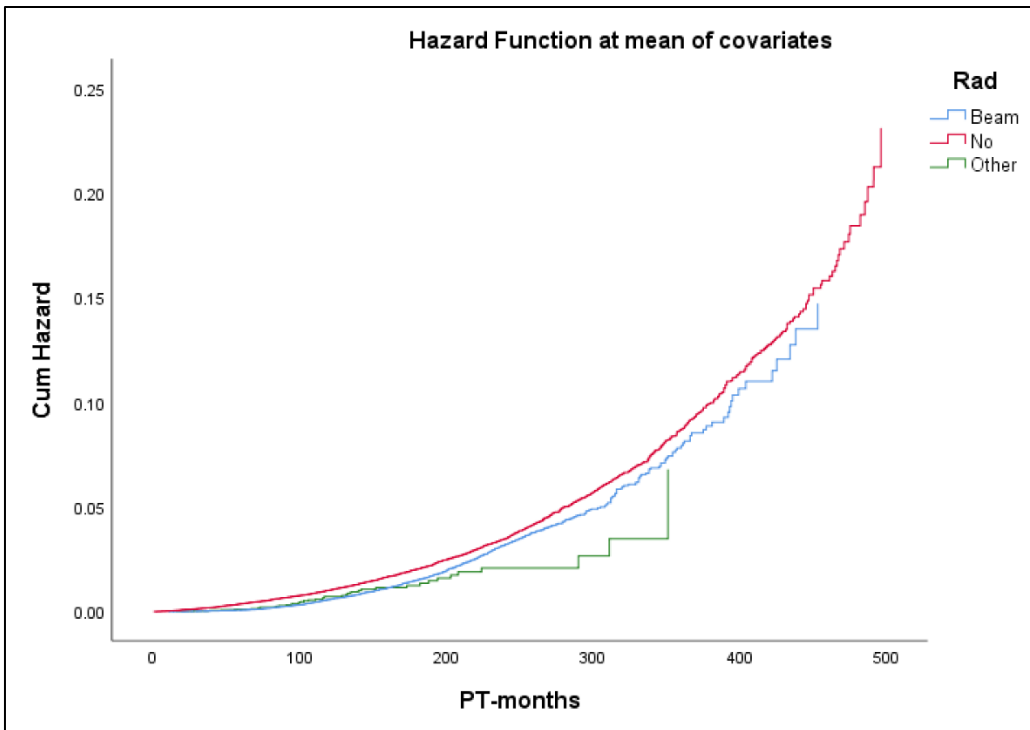

Figure S10. Baseline cumulative hazard curves for AD death in white women diagnosed with breast cancer at 45+ years. Cox model stratified on radiotherapy status.

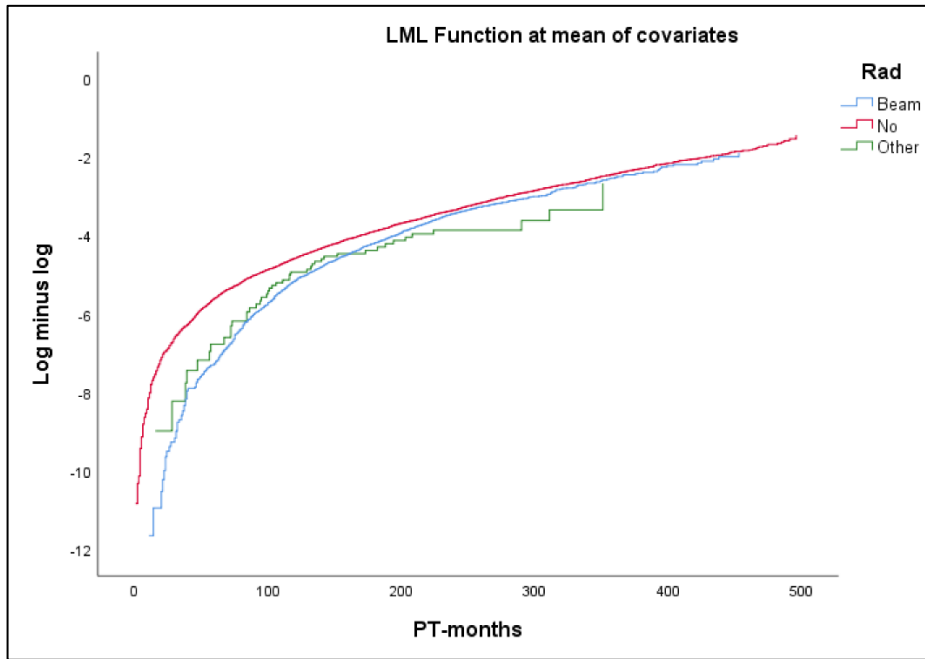

**Figure S11.** Log(-log survival) curves for AD death in white women diagnosed with breast cancer at 45+ years. Cox model stratified on radiotherapy status.

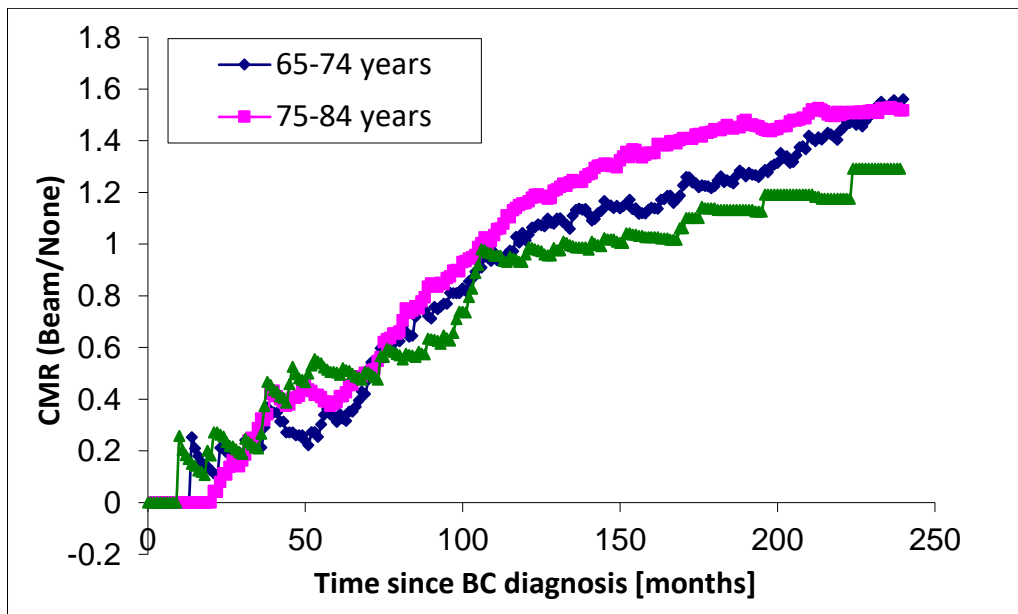

**Figure S12.** Cumulative AD mortality ratios (CMRs) for beam radiotherapy vs no/unknown radiation therapy groups. Point estimates shown for white female breast cancer (BC) patients diagnosed at 3 different age groups.

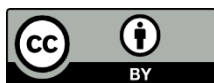

Supplement: s1 [file s1]
